# Supplementary material for: Detection of 191 Taxifolin Metabolites and Their Distribution in Rats Using HPLC-ESI-IT-TOF-MSn
Source: PubMed Central journal article supplement (PMC6273498; doi:10.3390/molecules21091209), 2016-09-13
Supplement: molecules-21-01209-s001.pdf [file molecules-21-01209-s001.pdf]

# **Supplementary Materials: Detection of 191 Taxifolin Metabolites and Their Distribution in Rats Using HPLC-ESI-IT-TOF-MS<sup>n</sup>**

**Ping Yang, Feng Xu, Hong-Fu Li, Yi-Wang, Feng-Chun Li, Ming-Ying Shang, Guang-Xue Liu, Xuan Wang, Shao-Qing Cai**

**Table S1.** Retention time ( $t_R$ ), HRMS<sup>n</sup> data, molecular formula and identification of taxifolin and its metabolites in rats by HPLC-DAD-ESI-IT-TOF-MS<sup>n</sup>.

|            | $t_R$ (min) | Formula                                           | Meas. $m/z$ | Identification             | Other Ions                                                          | HRMS <sup>n</sup> (Characteristic Fragment Ions and Their Relative Abundance)                                                                                                                                                  |
|------------|-------------|---------------------------------------------------|-------------|----------------------------|---------------------------------------------------------------------|--------------------------------------------------------------------------------------------------------------------------------------------------------------------------------------------------------------------------------|
| <b>TAX</b> | 41.023      | C <sub>15</sub> H <sub>12</sub> O <sub>7</sub>    | 303.0521    | Taxifolin(parent compound) | [M + H] <sup>+</sup> : 305.0621                                     | MS <sup>2</sup> [303.0520]: 285.0407(100.0), 241.0524(26.25), 217.0529(3.33), 177.0253(12.87), 175.0440(15.76), 125.0290(8.65); MS <sup>3</sup> [285.0406]: 241.0532(49.03), 213.0566(14.55), 199.0449(41.19), 175.0424(100.0) |
| <b>M1</b>  | 40.567      | C <sub>15</sub> H <sub>12</sub> O <sub>7</sub>    | 303.0502    | Taxifolin isomer 1         | [M + H] <sup>+</sup> : 305.0624<br>[2M - H] <sup>-</sup> : 607.1132 | MS <sup>2</sup> [303.0490]: 285.0371(100.0), 241.0504(18.49), 177.0236(11.8), 175.0525(10.39), 125.0286(8.51); MS <sup>3</sup> [285.0371]: 241.0589(100), 243.0344(35.54), 175.0387(94.08)                                     |
| <b>M2</b>  | 42.883      | C <sub>15</sub> H <sub>12</sub> O <sub>7</sub>    | 303.0517    | Taxifolin isomer 2         | [M + H] <sup>+</sup> : 305.0618<br>[2M - H] <sup>-</sup> : 607.1132 | MS <sup>2</sup> [303.0517]: 285.0425(100.0), 241.0521(33.23), 177.0302(5.75), 175.0444(9.38), 125.0258(7.83); MS <sup>3</sup> [285.0423]: 241.0454(60.16), 175.0465(100.0)                                                     |
| <b>M3</b>  | 21.517      | C <sub>15</sub> H <sub>12</sub> O <sub>10</sub> S | 383.0080    | Taxifolin sulphate 1       |                                                                     | MS <sup>2</sup> [383.0078]: 303.0514(5.67), 285.0383(100.0), 241.05(17.89), 175.0459(23.67), 125.0274(3.4); MS <sup>3</sup> [286.0426]: 241.0516(100.0), 217.0579(31.44), 199.0418(46.01), 175.0395(85.87)                     |
| <b>M4</b>  | 31.242      | C <sub>15</sub> H <sub>12</sub> O <sub>10</sub> S | 383.0089    | Taxifolin sulphate 2       |                                                                     | MS <sup>2</sup> [383.0089]: 303.049(12.71), 285.0384(100.0), 241.0512(14.26), 175.0457(10.69), 125.0288(1.69); MS <sup>3</sup> [285.0383]: 241.0529(65.85), 217.0571(27.1), 199.0452(41.93), 175.0442(100.0)                   |
| <b>M5</b>  | 32.145      | C <sub>15</sub> H <sub>12</sub> O <sub>10</sub> S | 383.0073    | Taxifolin sulphate 3       | [M + HCOOH - H] <sup>-</sup> :<br>429.0178                          | MS <sup>2</sup> [383.0073]: 303.05(11.06), 285.0394(100.0), 243.0294(1.76), 241.0481(11.2), 175.0424(4.11), 125.0317(1.39); MS <sup>3</sup> [285.0393]: 243.0196(12.25), 241.0527(24.74), 217.0512(18.5), 175.0416(100.0)      |
| <b>M6</b>  | 35.292      | C <sub>15</sub> H <sub>12</sub> O <sub>10</sub> S | 383.0078    | Taxifolin sulphate 4       |                                                                     | MS <sup>2</sup> [383.0077]: 303.0496(9.45), 285.0374(100.0), 241.0514(17.35), 175.0437(16.0), 125.0312(4.14); MS <sup>3</sup> [285.0373]: 241.0568(16.81), 213.0608(16.81), 199.0371(39.63), 175.0396(100.0)                   |
| <b>M7</b>  | 36.717      | C <sub>15</sub> H <sub>12</sub> O <sub>10</sub> S | 383.0079    | Taxifolin sulphate 5       |                                                                     | MS <sup>2</sup> [383.0079]: 303.0578(0.69), 285.0375(100.0), 241.0505(16.27), 217.048(5.3), 175.0531(9.78)                                                                                                                     |
| <b>M8</b>  | 37.925      | C <sub>15</sub> H <sub>12</sub> O <sub>10</sub> S | 383.0070    | Taxifolin sulphate 6       | [M + HCOOH - H] <sup>-</sup> :<br>429.0147                          | MS <sup>2</sup> [383.007]: 303.0488(11.05), 285.0375(100.0), 241.0503(22.65), 177.0265(10.85), 175.039(17.28), 125.0286(1.0); MS <sup>3</sup> [285.0374]: 217.0466(100.0), 199.0392(36.07), 195.0459(43.17)                    |
| <b>M9</b>  | 39.375      | C <sub>15</sub> H <sub>12</sub> O <sub>10</sub> S | 383.0087    | Taxifolin sulphate 7       | [M + H] <sup>+</sup> : 385.0219                                     | MS <sup>2</sup> [383.0086]: 303.0488(15.4), 285.0392(100.0), 241.0516(20.79), 199.0432(5.02), 175.0428(14.67); MS <sup>3</sup> [285.0392]: 243.0331(14.5), 241.0508(44.76), 217.0479(22.02), 199.0431(45.3), 175.0424(100.0)   |
| <b>M10</b> | 41.192      | C <sub>15</sub> H <sub>12</sub> O <sub>10</sub> S | 383.0086    | Taxifolin sulphate 8       | [M + H] <sup>+</sup> : 385.0222                                     | MS <sup>2</sup> [383.0089]: 303.0507(11.96), 285.0393(100.0), 241.0511(20.93), 175.0435(15.46), 125.0292(2.32); MS <sup>3</sup> [285.0392]: 241.0478(47.49), 199.0426(61.46), 175.0416(100.0), 129.0387(5.86), 125.0392(1.41)  |
| <b>M11</b> | 43.000      | C <sub>15</sub> H <sub>12</sub> O <sub>10</sub> S | 383.0082    | Taxifolin sulphate 9       | [M + H] <sup>+</sup> : 385.0227                                     | MS <sup>2</sup> [383.0082]: 303.0503(9.17), 285.0388(100.0), 241.0513(21.31), 177.0215(14.8), 175.0423(16.18); MS <sup>3</sup> [285.0387]: 217.0557(20.19), 213.0546(17.67), 199.042(57.12), 175.0414(100.0)                   |

|            | tr(min) | Formula                                                        | Meas. m/z | Identification                                     | Other Ions                                                                                              | HRMS <sup>a</sup> (Characteristic Fragment Ions and Their Relative Abundance)                                                                                                                                                                                            |
|------------|---------|----------------------------------------------------------------|-----------|----------------------------------------------------|---------------------------------------------------------------------------------------------------------|--------------------------------------------------------------------------------------------------------------------------------------------------------------------------------------------------------------------------------------------------------------------------|
| <b>M12</b> | 24.592  | C <sub>15</sub> H <sub>12</sub> O <sub>13</sub> S <sub>2</sub> | 462.9644  | Taxifolin disulphate 1                             | [M + CH <sub>3</sub> COOH - H] <sup>-</sup> :<br>522.9886                                               | MS <sup>2</sup> [462.9692]: 383.0074(100.0),303.0496(3.04),285.0342(1.52);<br>MS <sup>3</sup> [383.0074]: 285.0394(100.0), 241.0546(11.61), 177.0255(2.58),<br>175.0465(17.08), 151.012(8.59)                                                                            |
| <b>M13</b> | 27.458  | C <sub>15</sub> H <sub>12</sub> O <sub>13</sub> S <sub>2</sub> | 462.9670  | Taxifolin disulphate 2                             | [M + 2H <sub>2</sub> O - H] <sup>-</sup> : 498.9592                                                     | MS <sup>2</sup> [462.9673]: 383.0077(100.0), 303.0496(2.89), 285.0446(8.47),<br>230.9773(4.65); MS <sup>3</sup> [383.0077]: 285.0418(100.0), 241.0527(5.91),<br>217.0476(11.25), 177.0308(10.04), 175.0392(10.13)                                                        |
| <b>M14</b> | 31.075  | C <sub>15</sub> H <sub>12</sub> O <sub>13</sub> S <sub>2</sub> | 462.9639  | Taxifolin disulphate 3                             | [M + HCOOH - H] <sup>-</sup> :<br>509.0061<br>[M + CH <sub>3</sub> COOH - H] <sup>-</sup> :<br>523.0319 | MS <sup>2</sup> [462.9642]: 383.0077(100.0),303.0496(1.14),231.0069(1.69);<br>MS <sup>3</sup> [383.0076]: 303.0496(7.04), 285.0395(100.0), 241.0454(12.38),<br>175.0215(3.59), 125.0286(3.59)                                                                            |
| <b>M15</b> | 39.767  | C <sub>15</sub> H <sub>12</sub> O <sub>13</sub> S <sub>2</sub> | 462.9656  | Taxifolin disulphate 4                             |                                                                                                         | MS <sup>2</sup> [462.9657]: 383.0065(100.0), 303.061(3.2), 285.0368(5.53);<br>MS <sup>3</sup> [383.0065]: 303.0496(5.89), 285.0398(100.0), 241.0552(38.26),<br>175.0473(22.51), 125.0244(4.89)                                                                           |
| <b>M16</b> | 16.252  | C <sub>20</sub> H <sub>19</sub> NO <sub>13</sub><br>S          | 512.0509  | Taxifolin sulphate and pyroglutamic acid conjugate | [M + H] <sup>+</sup> : 514.1463                                                                         | MS <sup>2</sup> [512.054]: 415.0651(28.19), 397.0505(22.72), 383.0083(100.0),<br>303.0502(28.19), 285.0358(71.79), 241.059(13.11), 175.0446(13.8);<br>MS <sup>3</sup> [383.0083]: 353.2434(18.05), 285.0401(100.0), 259.0791(22.65),<br>241.0517(31.86), 177.0129(18.05) |
| <b>M17</b> | 15.408  | C <sub>21</sub> H <sub>20</sub> O <sub>13</sub>                | 479.0834  | Taxifolin glucuronide 1                            | [M + CH <sub>3</sub> COOH - H] <sup>-</sup> :539.1166                                                   | MS <sup>2</sup> [479.0892]: 303.0448(21.29), 285.0386(100.0), 241.0601(42.59),<br>231.4908(15.29), 175.0403(12.24)                                                                                                                                                       |
| <b>M18</b> | 18.637  | C <sub>21</sub> H <sub>20</sub> O <sub>13</sub>                | 479.0850  | Taxifolin glucuronide 2                            | [M + HCOOH - H] <sup>-</sup> :<br>525.0929                                                              | MS <sup>2</sup> [479.0912]: 303.0534(24.22), 285.0401(100.0), 241.0498(10.69),<br>177.0213(11.32), 175.0409(10.89); MS <sup>3</sup> [285.0400]: 243.0255(41.83),<br>197.0614(100.0)                                                                                      |
| <b>M19</b> | 20.253  | C <sub>21</sub> H <sub>20</sub> O <sub>13</sub>                | 479.0847  | Taxifolin glucuronide 3                            | [M + H] <sup>+</sup> : 481.0965                                                                         | MS <sup>2</sup> [479.0847]: 303.0472(17.51), 285.038(100.0), 241.0508(21.38),<br>177.0203(16.27), 175.0521(2.08); MS <sup>3</sup> [285.038]: 241.0527(14.07),<br>239.0353(14.07), 217.0466(21.1), 199.0464(100.0), 175.0502(45.58)                                       |
| <b>M20</b> | 21.370  | C <sub>21</sub> H <sub>20</sub> O <sub>13</sub>                | 479.0843  | Taxifolin glucuronide 4                            | [M + H] <sup>+</sup> : 481.0949                                                                         | MS <sup>2</sup> [479.0877]: 303.049(32.82), 285.0379(100.0), 241.0515(13.88),<br>177.0205(17.26), 175.0412(6.27); MS <sup>3</sup> [285.0378]: 241.0513(72.43),<br>199.0414(100.0), 175.0465(58.38)                                                                       |
| <b>M21</b> | 22.267  | C <sub>21</sub> H <sub>20</sub> O <sub>13</sub>                | 479.0838  | Taxifolin glucuronide 5                            | [M + H] <sup>+</sup> : 481.1133                                                                         | MS <sup>2</sup> [479.0863]: 303.047(28.1), 285.0392(100.0), 241.0507(10.52),<br>217.0466(4.3), 177.0242(1.54), 175.039(3.09)                                                                                                                                             |
| <b>M22</b> | 22.587  | C <sub>21</sub> H <sub>20</sub> O <sub>13</sub>                | 479.0847  | Taxifolin glucuronide 6                            | [M + H] <sup>+</sup> : 481.0898                                                                         | MS <sup>2</sup> [479.0865]: 383.0002(2.13), 303.053(27.43), 285.037(100.0),<br>241.0527(6.27), 177.0297(11.87), 175.0411(2.48); MS <sup>3</sup> [285.0368]:<br>217.0425(100.0), 175.0465(85.25), 81.139(57.92)                                                           |
| <b>M23</b> | 31.862  | C <sub>21</sub> H <sub>20</sub> O <sub>13</sub>                | 479.0830  | Taxifolin glucuronide 7                            | [M + H] <sup>+</sup> : 481.0848                                                                         | MS <sup>2</sup> [479.0864]: 285.0423(100.0), 259.0577(4.72), 243.0256(5.84),<br>241.0704(22.56), 177.0255(4.72), 175.0443(34.32); MS <sup>3</sup> [285.0422]:<br>175.0415(100.0), 129.0419(80.0)                                                                         |
| <b>M24</b> | 34.742  | C <sub>21</sub> H <sub>20</sub> O <sub>13</sub>                | 479.0832  | Taxifolin glucuronide 8                            | [M + H] <sup>+</sup> : 481.0872                                                                         | N                                                                                                                                                                                                                                                                        |
| <b>M25</b> | 37.267  | C <sub>21</sub> H <sub>20</sub> O <sub>13</sub>                | 479.0834  | Taxifolin glucuronide 9                            | [M + H] <sup>+</sup> : 481.0972                                                                         | MS <sup>2</sup> [479.0865]: 303.0551(3.1), 285.0393(100.0), 259.0654(6.68),<br>241.0511(21.39), 177.0192(8.25), 175.0421(14.67); MS <sup>3</sup> [285.0393]:<br>243.0492(50.0), 241.0601(100.0), 217.0884(74.51), 175.0516(62.25)                                        |

|            | tr(min) | Formula                                           | Meas. m/z | Identification                   | Other Ions                                                                                   | HRMS <sup>a</sup> (Characteristic Fragment Ions and Their Relative Abundance)                                                                                                                                                                                              |
|------------|---------|---------------------------------------------------|-----------|----------------------------------|----------------------------------------------------------------------------------------------|----------------------------------------------------------------------------------------------------------------------------------------------------------------------------------------------------------------------------------------------------------------------------|
| <b>M26</b> | 13.888  | C <sub>21</sub> H <sub>20</sub> O <sub>16</sub> S | 559.0388  | Taxifolin glucuronide sulphate 1 | [M + K] <sup>+</sup> : 599.0232                                                              | MS <sup>2</sup> [559.0472]: 383.0082(100.0), 303.0551(29.1), 285.0448(86.56), 241.0454(19.52), 177.0192(19.52)                                                                                                                                                             |
| <b>M27</b> | 16.703  | C <sub>21</sub> H <sub>20</sub> O <sub>16</sub> S | 559.0423  | Taxifolin glucuronide sulphate 2 | [M + 2H <sub>2</sub> O - H] <sup>-</sup> : 595.0978                                          | MS <sup>2</sup> [559.0425]: 479.0768(3.82), 383.006(88.44), 303.0496(38.47), 285.0408(100.0), 241.0601(5.76)                                                                                                                                                               |
| <b>M28</b> | 19.928  | C <sub>21</sub> H <sub>20</sub> O <sub>16</sub> S | 559.0406  | Taxifolin glucuronide sulphate 3 | [M + 2H <sub>2</sub> O - H] <sup>-</sup> : 595.0895                                          | MS <sup>2</sup> [559.045]: 479.0975(1.96), 383.0075(93.41), 303.0478(50.31), 285.0385(100.0), 241.059(10.52), 177.0318(4.95)                                                                                                                                               |
| <b>M29</b> | 21.812  | C <sub>21</sub> H <sub>20</sub> O <sub>16</sub> S | 559.0411  | Taxifolin glucuronide sulphate 4 | [M + HCOOH - H] <sup>-</sup> :<br>605.0349                                                   | MS <sup>2</sup> [559.0411]: 479.0872(2.9), 383.008(100.0), 303.0481(49.6), 285.0372(88.61), 241.0512(15.36), 175.0429(2.03); MS <sup>3</sup> [383.008]: 285.043(100.0), 257.0496(4.04), 241.0468(15.28), 199.0472(6.1), 177.0235(31.64), 175.0434(17.22)                   |
| <b>M30</b> | 23.087  | C <sub>21</sub> H <sub>20</sub> O <sub>16</sub> S | 559.0418  | Taxifolin glucuronide sulphate 5 |                                                                                              | MS <sup>2</sup> [559.0429]: 383.0072(100.0), 303.0493(18.56), 285.0375(89.58), 241.0509(2.6), 175.0716(1.96); MS <sup>3</sup> [383.007]: 285.0486(100.0), 243.027(7.03), 177.0507(10.55), 151.0586(10.55)                                                                  |
| <b>M31</b> | 24.762  | C <sub>21</sub> H <sub>20</sub> O <sub>16</sub> S | 559.0425  | Taxifolin glucuronide sulphate 6 | [M + CH <sub>3</sub> HCOOH - H] <sup>-</sup> :<br>619.0803[M + K] <sup>+</sup> :<br>599.0128 | MS <sup>2</sup> [559.0428]: 383.0062(100.0), 303.0488(39.46), 285.0367(91.03), 243.0393(1.65), 241.0528(18.71), 175.0358(6.0)                                                                                                                                              |
| <b>M32</b> | 25.797  | C <sub>21</sub> H <sub>20</sub> O <sub>16</sub> S | 559.0411  | Taxifolin glucuronide sulphate 7 |                                                                                              | MS <sup>2</sup> [559.0411]: 383.0068(100.0), 303.0465(23.09), 285.0387(71.61), 241.0502(10.1), 177.02(1.82), 175.0348(1.21)                                                                                                                                                |
| <b>M33</b> | 50.292  | C <sub>16</sub> H <sub>14</sub> O <sub>7</sub>    | 317.0675  | 3'-O-Methyltaxifolin             | [M + H] <sup>+</sup> : 319.0782                                                              | MS <sup>2</sup> [317.0674]: 299.0567(4.3), 289.0718(100.0), 275.0559(1.81), 273.0753(6.36), 231.0668(7.17), 230.0596(6.54), 152.0141(7.15), 125.0276(6.28); MS <sup>3</sup> [289.0717]: 275.0491(20.25), 231.0637(16.06), 230.0642(38.12), 152.014(100.0), 125.0317(17.29) |
| <b>M34</b> | 51.350  | C <sub>16</sub> H <sub>14</sub> O <sub>7</sub>    | 317.0673  | 4'-O-Methyltaxifolin             | [M + H] <sup>+</sup> : 319.0791                                                              | MS <sup>2</sup> [317.2205]: 299.0586(4.08), 289.072(100.0), 275.056(3.09), 230.0592(6.3), 152.0147(7.56); MS <sup>3</sup> [289.0718]: 275.0521(13.72), 274.0503(24.58), 231.0648(15.28), 152.0159(100.0), 125.0363(16.05)                                                  |
| <b>M35</b> | 52.875  | C <sub>16</sub> H <sub>14</sub> O <sub>7</sub>    | 317.0667  | 7-O-Methyltaxifolin              | [M + H] <sup>+</sup> : 319.0786                                                              | MS <sup>2</sup> [317.0665]: 299.0567(16.86), 289.0698(51.55), 231.0592(11.55), 230.0602(33.52), 216.0428(20.03), 214.0649(11.55), 166.0254(6.53), 165.0259(13.14), 152.0132(100.0), 125.0282(75.55); MS <sup>3</sup> [274.046]: 152.0121(100.0), 125.018(9.13)             |
| <b>M36</b> | 53.592  | C <sub>16</sub> H <sub>14</sub> O <sub>7</sub>    | 317.0660  | 3-O-Methyltaxifolin              | [M + H] <sup>+</sup> : 319.0842                                                              | MS <sup>2</sup> [317.0645]: 299.0606(46.64), 289.0714(65.79), 284.0328(29.14), 274.0481(51.89), 240.0466(20.24), 230.0559(27.86), 152.01(100.0), 125.0286(53.06); MS <sup>3</sup> [289.0713]: 275.4196(66.23), 230.0723(100.0), 152.0087(100.0)                            |
| <b>M37</b> | 28.575  | C <sub>16</sub> H <sub>14</sub> O <sub>10</sub> S | 397.0243  | Methyl taxifolin sulphate 1      | [M + H] <sup>+</sup> : 399.0333                                                              | MS <sup>2</sup> [397.0245]: 317.0646(95.45), 299.054(1.59), 289.0715(100.0), 273.0751(8.37), 258.0557(2.21), 231.0691(3.5); MS <sup>3</sup> [289.0714]: 274.0383(21.25), 229.0535(7.08), 179.0726(7.08), 152.0171(100.0), 125.0233(7.08)                                   |
| <b>M38</b> | 33.942  | C <sub>16</sub> H <sub>14</sub> O <sub>10</sub> S | 397.0240  | Methyl taxifolin sulphate 2      | [M + H] <sup>+</sup> : 399.0333                                                              | MS <sup>2</sup> [397.0241]: 317.0646(97.68), 299.0554(2.38), 289.0703(100.0), 274.0471(3.37), 273.0752(7.19), 231.0632(5.98); MS <sup>3</sup> [289.0703]:                                                                                                                  |

|            | tr(min) | Formula                                           | Meas. m/z | Identification                 | Other Ions                                              | HRMS <sup>a</sup> (Characteristic Fragment Ions and Their Relative Abundance)                                                                                                                                                                               |
|------------|---------|---------------------------------------------------|-----------|--------------------------------|---------------------------------------------------------|-------------------------------------------------------------------------------------------------------------------------------------------------------------------------------------------------------------------------------------------------------------|
|            |         |                                                   |           |                                |                                                         | 275.0635(4.97), 274.0473(5.81), 230.0636(4.13), 152.0193(100.0), 125.0286(3.29), 123.0037(3.29)                                                                                                                                                             |
| <b>M39</b> | 34.420  | C <sub>16</sub> H <sub>14</sub> O <sub>10</sub> S | 397.0247  | Methyl taxifolin sulphate 3    |                                                         | MS <sup>2</sup> [397.0248]: 317.0651(100.0), 289.0700(100.0), 273.0809(4.17), 258.0527(2.09), 231.0673(5.55)                                                                                                                                                |
| <b>M40</b> | 35.858  | C <sub>16</sub> H <sub>14</sub> O <sub>10</sub> S | 397.0253  | Methyl taxifolin sulphate 4    | [M + HCOOH – H] <sup>+</sup> : 443.0598                 | MS <sup>2</sup> [397.0256]: 317.066(100.0), 299.0496(1.27), 289.0717(83.29), 273.0771(8.94), 231.0657(3.43), 152.0195(1.27); MS <sup>3</sup> [317.0659]: 299.0501(10.55), 289.0722(100.0), 274.0446(21.01), 137.0202(8.44), 125.0339(8.44)                  |
| <b>M41</b> | 38.092  | C <sub>16</sub> H <sub>14</sub> O <sub>10</sub> S | 397.0241  | Methyl taxifolin sulphate 5    | [M + H] <sup>+</sup> : 399.0617                         | MS <sup>2</sup> [397.0242]: 317.0653(100.0), 299.0576(4.32), 289.0717(97.36), 258.0519(3.75), 231.0677(5.08), 152.012(0.52); MS <sup>3</sup> [317.0652]: 299.0522(2.69), 289.0715(100.0), 275.0601(2.69), 274.0487(19.53), 152.014(11.28), 125.0291(10.3)   |
| <b>M42</b> | 40.283  | C <sub>16</sub> H <sub>14</sub> O <sub>10</sub> S | 397.0233  | Methyl taxifolin sulphate 6    | [M + H] <sup>+</sup> : 399.0428                         | MS <sup>2</sup> [397.0235]: 317.0646(95.02), 299.0567(1.12), 289.0713(100.0), 273.0782(10.29), 231.0645(4.86); MS <sup>3</sup> [289.0713]: 230.0637(28.09), 213.0677(22.55), 152.0048(100.0)                                                                |
| <b>M43</b> | 41.817  | C <sub>16</sub> H <sub>14</sub> O <sub>10</sub> S | 397.0241  | Methyl taxifolin sulphate 7    | [M + H] <sup>+</sup> : 399.0333                         | MS <sup>2</sup> [397.0244]: 317.066(76.6), 299.0485(1.14), 289.0712(100.0), 274.049(7.7), 273.0763(13.71), 231.0645(7.5), 230.0565(7.61), 152.0178(5.16); MS <sup>3</sup> [289.0711]: 274.0383(10.84), 230.0651(7.13), 152.0105(100.0)                      |
| <b>M44</b> | 42.717  | C <sub>16</sub> H <sub>14</sub> O <sub>10</sub> S | 397.0230  | Methyl taxifolin sulphate 8    | [M + H] <sup>+</sup> : 399.0333                         | MS <sup>2</sup> [397.0232]: 317.0643(86.98), 299.0558(2.81), 289.0705(100.0), 274.0424(2.81), 273.0753(9.12), 258.0517(4.65), 231.0625(2.13), 152.0327(2.56); MS <sup>3</sup> [289.0704]: 274.054(11.83), 230.0538(20.75), 152.0107(100.0), 125.0498(11.83) |
| <b>M45</b> | 43.600  | C <sub>16</sub> H <sub>14</sub> O <sub>10</sub> S | 397.0235  | Methyl taxifolin sulphate 9    | [M + H] <sup>+</sup> : 399.0523                         | MS <sup>2</sup> [397.0236]: 317.0638(81.59), 299.0546(4.06), 289.0698(100.0), 273.0764(7.76), 258.0515(4.4), 231.0744(6.64), 152.0139(3.27); MS <sup>3</sup> [289.0697]: 274.0477(8.95), 258.0588(4.49), 230.0579(28.57), 152.0215(100.0), 125.0286(3.62)   |
| <b>M46</b> | 45.558  | C <sub>16</sub> H <sub>14</sub> O <sub>10</sub> S | 397.0238  | Methyl taxifolin sulphate 10   | [M + CH <sub>3</sub> HCOOH – H] <sup>+</sup> : 457.0121 | MS <sup>2</sup> [397.024]: 317.0652(97.99), 299.0532(38.06), 289.072(76.49), 274.0481(18.77), 258.0491(13.35), 245.0114(100.0), 165.0444(26.72), 152.0134(4.48); MS <sup>3</sup> [245.0115]: 165.0584(100.0), 150.3843(18.37), 150.0244(27.21)              |
| <b>M47</b> | 23.520  | C <sub>22</sub> H <sub>22</sub> O <sub>13</sub>   | 493.0973  | Methyl taxifolin glucuronide 1 | [M + H] <sup>+</sup> : 495.1021                         | MS <sup>2</sup> [493.1057]: 317.0651(100.0), 299.0567(1.28), 289.0713(65.83), 273.0804(5.82), 231.0645(3.87), 230.0608(4.52); MS <sup>3</sup> [317.065]: 289.0734(100.0), 274.0446(29.98)                                                                   |
| <b>M48</b> | 25.212  | C <sub>22</sub> H <sub>22</sub> O <sub>13</sub>   | 493.1012  | Methyl taxifolin glucuronide 2 | [M + H] <sup>+</sup> : 495.1153                         | MS <sup>2</sup> [493.1014]: 317.0644(100.0), 299.0526(2.98), 289.0707(86.87), 273.075(2.96), 229.0893(2.22), 152.0309(1.86); MS <sup>3</sup> [317.0642]: 289.072(100.0), 230.0579(20.19), 125.0286(29.9)                                                    |
| <b>M49</b> | 26.687  | C <sub>22</sub> H <sub>22</sub> O <sub>13</sub>   | 493.1012  | Methyl taxifolin glucuronide 3 | [M + H] <sup>+</sup> : 495.1101                         | MS <sup>2</sup> [493.1032]: 317.0646(91.34), 299.064(2.65), 289.0708(100.0), 274.0553(9.18), 273.0792(5.73), 258.0537(3.78), 231.064(5.88),                                                                                                                 |

| tr(min) | Formula                                           | Meas. m/z | Identification                                 | Other Ions                      | HRMS <sup>a</sup> (Characteristic Fragment Ions and Their Relative Abundance)                                                                                                                                                                                 |
|---------|---------------------------------------------------|-----------|------------------------------------------------|---------------------------------|---------------------------------------------------------------------------------------------------------------------------------------------------------------------------------------------------------------------------------------------------------------|
|         |                                                   |           |                                                |                                 | 230.0609(4.53); MS <sup>3</sup> [289.0708]: 274.054(11.46), 230.0493(9.55), 152.012(100.0), 125.0392(11.46)                                                                                                                                                   |
| M50     | C <sub>22</sub> H <sub>22</sub> O <sub>13</sub>   | 493.1012  | Methyl taxifolin glucuronide 4                 | [M + H] <sup>+</sup> : 495.1335 | MS <sup>2</sup> [493.1028]: 317.0648(100.0), 299.0595(16.32), 289.0707(98.02), 274.054(4.15), 273.0703(10.31), 231.0583(2.41); MS <sup>3</sup> [317.0646]: 289.0711(100.0), 258.0527(27.04), 231.0645(27.04)                                                  |
| M51     | C <sub>22</sub> H <sub>22</sub> O <sub>13</sub>   | 493.1007  | Methyl taxifolin glucuronide 5                 | [M + H] <sup>+</sup> : 495.0873 | MS <sup>2</sup> [493.1011]: 475.0909(17.95), 359.0714(7.65), 331.0818(19.27), 317.0646(41.77), 299.0548(39.97), 289.0703(100.0), 284.0371(10.41), 274.0462(7.17); MS <sup>3</sup> [289.0702]: 152.0106(100.0)                                                 |
| M52     | C <sub>22</sub> H <sub>22</sub> O <sub>13</sub>   | 493.0998  | Methyl taxifolin glucuronide 6                 | [M + H] <sup>+</sup> : 495.1161 | MS <sup>2</sup> [493.1046]: 317.0645(55.37), 299.0525(9.98), 289.0695(100.0), 273.0709(5.43), 258.0527(4.2), 230.0615(5.98), 188.0479(5.63); MS <sup>3</sup> [289.0694]: 274.0383(57.92), 243.0639(57.92), 223.8944(57.92), 152.0095(100.0)                   |
| M53     | C <sub>22</sub> H <sub>22</sub> O <sub>13</sub>   | 493.1004  | Methyl taxifolin glucuronide 7                 | [M + H] <sup>+</sup> : 495.1375 | MS <sup>2</sup> [493.1006]: 359.0698(1.25), 331.0861(2.45), 317.0653(60.45), 299.0546(18.79), 289.0693(100.0), 284.0289(2.15), 275.0426(1.86), 273.0803(5.52), 258.0546(8.17), 152.0029(1.25)                                                                 |
| M54     | C <sub>22</sub> H <sub>22</sub> O <sub>13</sub>   | 493.0998  | Methyl taxifolin glucuronide 8                 | [M + H] <sup>+</sup> : 495.1176 | MS <sup>2</sup> [493.1001]: 389.0919(9.65), 361.1005(7.22), 359.0722(100.0), 341.0611(8.43), 331.0791(65.09), 317.0686(55.48), 289.0682(93.96), 231.0711(13.26)                                                                                               |
| M55     | C <sub>22</sub> H <sub>22</sub> O <sub>13</sub>   | 493.1008  | Methyl taxifolin glucuronide 9                 | [M + H] <sup>+</sup> : 495.1031 | N                                                                                                                                                                                                                                                             |
| M56     | C <sub>22</sub> H <sub>22</sub> O <sub>16</sub> S | 573.0560  | Methyl taxifolin glucuronide sulphate 1        |                                 | MS <sup>2</sup> [573.0562]: 493.0971(79.52), 373.0538(100.0), 345.0588(20.05), 327.0453(3.96), 317.064(2.82); MS <sup>3</sup> [373.0538]: 345.0626(45.61), 327.0478(45.69), 317.0623(100.0), 301.0697(14.01), 176.994(11.94), 165.0203(8.11), 137.0258(11.94) |
| M57     | C <sub>22</sub> H <sub>22</sub> O <sub>16</sub> S | 573.0533  | Methyl taxifolin glucuronide sulphate 2        |                                 | MS <sup>2</sup> [573.0613]: 493.0986(95.06), 373.0576(100.0), 345.0592(27.89), 327.0626(15.21), 317.0625(4.76), 301.0744(3.57); MS <sup>3</sup> [373.0577]: 345.068(66.23), 317.0899(66.23), 193.0275(100.0)                                                  |
| M58     | C <sub>21</sub> H <sub>21</sub> NO <sub>10</sub>  | 446.1107  | Methyl taxifolin pyroglutamic acid conjugate 1 | [M + H] <sup>+</sup> : 448.1151 | N                                                                                                                                                                                                                                                             |
| M59     | C <sub>21</sub> H <sub>21</sub> NO <sub>10</sub>  | 446.1086  | Methyl taxifolin pyroglutamic acid conjugate 2 | [M + H] <sup>+</sup> : 448.1187 | MS <sup>2</sup> [446.1086]: 429.1075(3.05), 317.0688(27.21), 289.0729(100.0), 273.075(4.57)                                                                                                                                                                   |
| M60     | C <sub>16</sub> H <sub>14</sub> O <sub>11</sub> S | 413.0200  | Hydroxylated methyl taxifolin sulphate 1       |                                 | MS <sup>2</sup> [413.02]: 333.06(66.16), 316.0592(6.39), 315.0486(100.0), 285.0382(8.51), 283.0225(36.67), 255.0281(19.97); MS <sup>3</sup> [315.0486]: 285.0358(8.8), 284.0278(14.05), 283.0213(66.56), 256.0334(7.09), 255.03(100.0)                        |
| M61     | C <sub>16</sub> H <sub>14</sub> O <sub>11</sub> S | 413.0175  | Hydroxylated methyl taxifolin sulphate 2       |                                 | N                                                                                                                                                                                                                                                             |
| M62     | C <sub>16</sub> H <sub>14</sub> O <sub>11</sub> S | 413.0198  | Hydroxylated methyl taxifolin sulphate 3       |                                 | MS <sup>2</sup> [413.0197]: 333.0578(4.33), 315.0468(100.0), 305.0684(18.88), 283.0237(25.58), 255.0298(6.5), 211.0392(7.26), 181.0156(5.93), 177.025(20.05), 155.0399(18.85); MS <sup>3</sup> [315.0467]: 300.0565(21.22),                                   |

| <b>tr(min)</b> | <b>Formula</b>                                    | <b>Meas. m/z</b> | <b>Identification</b>                                 | <b>Other Ions</b>               | <b>HRMS<sup>a</sup>(Characteristic Fragment Ions and Their Relative Abundance)</b>                                                                                                                                                                                                              |
|----------------|---------------------------------------------------|------------------|-------------------------------------------------------|---------------------------------|-------------------------------------------------------------------------------------------------------------------------------------------------------------------------------------------------------------------------------------------------------------------------------------------------|
|                |                                                   |                  |                                                       |                                 | 283.0265(68.37), 255.0342(94.29), 239.0353(21.22), 211.0425(100.0), 139.0619(21.22)                                                                                                                                                                                                             |
| <b>M63</b>     | C <sub>16</sub> H <sub>14</sub> O <sub>11</sub> S | 413.0191         | Hydroxylated methyl taxifolin sulphate 4              |                                 | MS <sup>2</sup> [413.0222]: 333.0634(6.35), 315.0531(100.0), 305.0708(9.05), 290.0406(26.17), 283.028(12.67), 211.0336(3.65), 183.0292(5.47), 181.0168(7.23), 177.0246(6.35), 155.042(9.12), 153.0262(3.65), 149.0285(5.47), 139.0061(3.65)                                                     |
| <b>M64</b>     | C <sub>16</sub> H <sub>14</sub> O <sub>9</sub>    | 349.0580         | Methylated and dihydroxylated taxifolin 1             | [M + H] <sup>+</sup> : 351.1037 | MS <sup>2</sup> [349.0579]: 331.0377(45.13), 313.0387(5.7), 285.0422(5.7), 269.043(100.0), 209.0125(38.12), 169.0145(15.5), 165.0251(7.12), 151.0105(97.97), 149.0228(5.7)                                                                                                                      |
| <b>M65</b>     | C <sub>16</sub> H <sub>14</sub> O <sub>9</sub>    | 349.0551         | Methylated and dihydroxylated taxifolin 2             |                                 | MS <sup>2</sup> [349.0617]: 331.0549(38.24), 287.0453(13.9), 227.0237(13.9), 209.0081(100.0), 181.0113(13.9), 169.0177(31.02), 161.0308(13.9), 151.0035(79.28), 139.0403(13.9), 121.0273(20.86)                                                                                                 |
| <b>M66</b>     | C <sub>22</sub> H <sub>22</sub> O <sub>15</sub>   | 525.0865         | Methylated and dihydroxylated taxifolin glucuronide 1 | [M + K] <sup>+</sup> : 565.0779 | MS <sup>2</sup> [525.0866]: 349.0552(17.05), 332.0346(4.38), 331.0427(88.77), 301.0334(10.64), 300.0237(44.17), 299.0195(100.0), 273.0359(4.38), 272.025(6.45), 271.0206(79.82), 227.037(8.53), 211.052(6.45)                                                                                   |
| <b>M67</b>     | C <sub>22</sub> H <sub>22</sub> O <sub>15</sub>   | 525.0908         | Methylated and dihydroxylated taxifolin glucuronide 2 | [M + K] <sup>+</sup> : 565.0803 | MS <sup>2</sup> [525.0934]: 349.0525(19.31), 331.0425(100.0), 317.0224(1.95), 301.0306(19.8), 300.0266(31.91), 299.0183(71.56), 272.0197(3.87), 271.0237(65.13), 255.0191(2.89), 227.0323(2.91); MS <sup>3</sup> [331.0424]: 301.0317(29.61), 300.0237(58.77), 298.9748(35.54), 271.0223(100.0) |
| <b>M68</b>     | C <sub>22</sub> H <sub>22</sub> O <sub>15</sub>   | 525.0890         | Methylated and dihydroxylated taxifolin glucuronide 3 | [M + K] <sup>+</sup> : 565.0891 | MS <sup>2</sup> [525.093]: 349.0508(23.98), 331.0433(100.0), 301.0334(22.62), 300.0256(49.86), 299.0186(62.42), 271.0248(52.95); MS <sup>3</sup> [331.0432]: 300.0247(36.78), 299.0151(20.83), 271.0269(100.0), 149.0632(6.38)                                                                  |
| <b>M69</b>     | C <sub>22</sub> H <sub>22</sub> O <sub>15</sub>   | 525.0911         | Methylated and dihydroxylated taxifolin glucuronide 4 | [M + K] <sup>+</sup> : 565.0762 | MS <sup>2</sup> [525.0942]: 349.0541(37.32), 331.043(100.0), 301.0289(12.54), 300.0267(46.8), 299.0167(75.71), 271.0242(67.54), 255.0302(5.14); MS <sup>3</sup> [331.0428]: 301.0307(9.56), 300.0309(25.46), 299.0325(59.2), 271.0214(100.0), 179.0156(6.41)                                    |
| <b>M70</b>     | C <sub>15</sub> H <sub>10</sub> O <sub>7</sub>    | 301.0350         | Quercetin                                             | [M + H] <sup>+</sup> : 303.0462 | MS <sup>2</sup> [301.0349]: 283.0221(1.27), 273.0359(4.34), 271.0265(5.52), 243.0196(1.1), 229.0546(3.45), 227.0385(2.73), 193.0197(3.38), 178.9972(46.63), 151.0073(100.0), 121.0354(3.27), 107.0152(6.98)                                                                                     |
| <b>M71</b>     | C <sub>15</sub> H <sub>10</sub> O <sub>10</sub> S | 380.9933         | Quercetin-5- <i>O</i> -sulphate                       | [M + H] <sup>+</sup> : 383.0062 | MS <sup>2</sup> [380.9944]: 301.0337(100.0), 179.0002(2.12), 151.0086(2.11); MS <sup>3</sup> [301.0336]: 227.0287(7.24), 217.0536(9.5), 213.038(18.99), 199.0422(4.84), 183.042(7.29), 179.0017(32.68), 163.027(12.95), 151.0048(100.0), 107.0212(15.59)                                        |
| <b>M72</b>     | C <sub>15</sub> H <sub>10</sub> O <sub>10</sub> S | 380.9932         | Quercetin-7- <i>O</i> -sulphate                       | [M + H] <sup>+</sup> : 383.0058 | MS <sup>2</sup> [380.9932]: 301.0335(100.0); MS <sup>3</sup> [301.0334]: 211.0305(100.0), 161.038(72.13)                                                                                                                                                                                        |
| <b>M73</b>     | C <sub>15</sub> H <sub>10</sub> O <sub>10</sub> S | 380.9922         | Quercetin-4'- <i>O</i> -sulphate                      | [M + H] <sup>+</sup> : 382.9957 | MS <sup>2</sup> [380.9962]: 301.0336(100.0), 179.0036(7.84), 151.0063(5.4); MS <sup>3</sup> [301.0336]: 285.1062(7.11), 229.0392(10.67), 211.0474(14.22), 179.0042(26.53), 151.0064(100.0)                                                                                                      |

| <b>tr(min)</b> | <b>Formula</b> | <b>Meas. m/z</b>                                               | <b>Identification</b> | <b>Other Ions</b>                   | <b>HRMS<sup>a</sup>(Characteristic Fragment Ions and Their Relative Abundance)</b>                                                                                                                                                                                                                               |
|----------------|----------------|----------------------------------------------------------------|-----------------------|-------------------------------------|------------------------------------------------------------------------------------------------------------------------------------------------------------------------------------------------------------------------------------------------------------------------------------------------------------------|
| <b>M74</b>     | 57.033         | C <sub>15</sub> H <sub>10</sub> O <sub>10</sub> S              | 380.9932              | Quercetin-3'-O-sulphate             | [M + H] <sup>+</sup> : 383.0044<br>MS <sup>2</sup> [380.9933]: 301.0332(100.0), 179.0019(10.35), 151.0081(5.43);<br>MS <sup>3</sup> [302.0374]: 273.0391(11.66), 229.0529(9.83), 193.0174(7.62),<br>179.0024(69.17), 151.0093(100.0), 121.0308(1.09), 107.0187(4.38)                                             |
| <b>M75</b>     | 58.173         | C <sub>15</sub> H <sub>10</sub> O <sub>10</sub> S              | 380.9937              | Quercetin-3-O-sulphate              | MS <sup>2</sup> [380.9871]: 301.0323(100.0), 300.0739(4.11), 179.0083(24.98),<br>151.0033(22.85)                                                                                                                                                                                                                 |
| <b>M76</b>     | 37.542         | C <sub>21</sub> H <sub>18</sub> O <sub>13</sub>                | 477.0688              | Quercetin glucuronide               | [M + H] <sup>+</sup> : 479.0798<br>MS <sup>2</sup> [477.0773]: 343.0457(5.11), 301.032(100.0), 273.0359(1.86),<br>178.997(17.1), 161.0301(2.79), 151.0004(1.86)                                                                                                                                                  |
| <b>M77</b>     | 40.727         | C <sub>21</sub> H <sub>18</sub> O <sub>16</sub> S              | 557.0252              | Quercetin glucuronide sulphate 1    | [M + Na] <sup>+</sup> : 580.9350<br>MS <sup>2</sup> [557.0273]: 477.0707(3.6), 301.0325(100.0), 273.0423(1.64)<br>MS <sup>3</sup> [301.0325]: 178.9978(62.02), 152.0029(50.0), 151.012(100.0)                                                                                                                    |
| <b>M78</b>     | 41.068         | C <sub>21</sub> H <sub>18</sub> O <sub>16</sub> S              | 557.0268              | Quercetin glucuronide sulphate 2    | [M + 2H <sub>2</sub> O - H] <sup>+</sup> : 593.0172<br>MS <sup>2</sup> [557.0302]: 477.0682(5.04), 380.9827(0.67), 301.0326(100.0),<br>179.0052(2.62); MS <sup>3</sup> [301.0324]: 229.0519(86.98), 151.0109(100.0)                                                                                              |
| <b>M79</b>     | 41.443         | C <sub>21</sub> H <sub>18</sub> O <sub>16</sub> S              | 557.0269              | Quercetin glucuronide sulphate 3    | [M + HCOOH - H] <sup>+</sup> :<br>602.9751<br>MS <sup>2</sup> [557.0277]: 380.9935(3.47), 301.0342(100.0), 178.9903(0.91)                                                                                                                                                                                        |
| <b>M80</b>     | 65.417         | C <sub>16</sub> H <sub>12</sub> O <sub>7</sub>                 | 315.0503              | Isorhamnetin                        | [M + H] <sup>+</sup> : 317.0623<br>MS <sup>2</sup> [315.0504]: 301.0307(30.16), 300.0274(100.0), 271.0252(5.39),<br>227.0417(3.37), 151.0064(7.64); MS <sup>3</sup> [299.8252]: 271.0263(100.0),<br>255.0645(8.31), 243.0281(14.39), 228.0799(16.62), 227.0396(33.01),<br>151.0095(24.7), 107.0076(8.31)         |
| <b>M81</b>     | 48.633         | C <sub>16</sub> H <sub>12</sub> O <sub>10</sub> S              | 395.0081              | Isorhamnetin-5-O-sulphate           | [M + H] <sup>+</sup> : 397.0162<br>MS <sup>2</sup> [395.0083]: 315.0478(100.0), 300.0257(9.79), 228.037(2.71),<br>151.0054(1.35), 107.9698(0.77); MS <sup>3</sup> [315.0478]: 300.0212(100.0),<br>284.0198(6.56), 273.0359(4.43), 228.037(8.78), 192.0157(4.43)                                                  |
| <b>M82</b>     | 56.917         | C <sub>16</sub> H <sub>12</sub> O <sub>10</sub> S              | 395.0082              | Isorhamnetin-7-O-sulphate           | [M + H] <sup>+</sup> : 397.0179<br>MS <sup>2</sup> [395.0084]: 315.0491(100.0), 300.0279(10.27), 287.0443(0.94),<br>151.0098(4.64); MS <sup>3</sup> [315.0492]: 300.0297(100.0), 285.0262(7.32),<br>284.0294(9.19), 272.0353(25.84), 151.0115(67.22), 149.4103(7.32)                                             |
| <b>M83</b>     | 58.042         | C <sub>16</sub> H <sub>12</sub> O <sub>10</sub> S              | 395.0085              | Isorhamnetin-3-O-sulphate           | [M + H] <sup>+</sup> : 397.0235<br>MS <sup>2</sup> [395.0086]: 315.0487(100.0), 301.0291(1.79), 300.0266(17.54),<br>283.0312(0.13); MS <sup>3</sup> [315.0487]: 301.0305(42.99), 300.0265(100.0),<br>271.0254(4.58), 227.0376(2.67), 151.011(8.71)                                                               |
| <b>M84</b>     | 58.922         | C <sub>16</sub> H <sub>12</sub> O <sub>10</sub> S              | 395.0082              | Isorhamnetin-4'-O-sulphate          | [M + H] <sup>+</sup> : 396.9741<br>[M + HCOOH - H] <sup>+</sup> :<br>441.0783<br>MS <sup>2</sup> [395.0054]: 315.0481(100.0), 300.0299(33.72), 297.0348(5.5),<br>289.0695(3.69), 221.0411(7.31), 165.0446(3.69), 152.0379(3.69),<br>137.0147(3.69); MS <sup>3</sup> [315.0481]: 300.0352(100.0), 299.9024(11.01) |
| <b>M85</b>     | 48.308         | C <sub>16</sub> H <sub>12</sub> O <sub>13</sub> S <sub>2</sub> | 474.9658              | Isorhamnetin disulphate             | [M + HCOOH - H] <sup>+</sup> :<br>520.9840<br>MS <sup>2</sup> [474.9694]: 395.0033(83.92), 315.0486(100.0); MS <sup>3</sup> [315.0486]:<br>300.0299(100.0)                                                                                                                                                       |
| <b>M86</b>     | 49.212         | C <sub>22</sub> H <sub>20</sub> O <sub>13</sub>                | 491.0852              | Isorhamnetin-4'-O-glucuronide       | [M + H] <sup>+</sup> : 493.0949<br>MS <sup>2</sup> [491.0855]: 315.0516(100.0), 300.0276(34.63), 231.0357(1.74);<br>MS <sup>3</sup> [315.0516]: 300.0311(100.0), 151.012(7.71)                                                                                                                                   |
| <b>M87</b>     | 50.428         | C <sub>22</sub> H <sub>20</sub> O <sub>13</sub>                | 491.0836              | Isorhamnetin-7-O-glucuronide        | [M + H] <sup>+</sup> : 493.1021<br>MS <sup>2</sup> [491.0838]: 315.0505(100.0), 301.0252(7.02), 300.0301(31.77);<br>MS <sup>3</sup> [315.0504]: 300.0401(100.0)                                                                                                                                                  |
| <b>M88</b>     | 40.143         | C <sub>22</sub> H <sub>20</sub> O <sub>16</sub> S              | 571.0381              | Isorhamnetin glucuronide sulphate 1 | [M + H] <sup>+</sup> : 573.0258<br>MS <sup>2</sup> [571.038]: 491.0783(1.6), 315.0491(100.0), 300.0234(26.2),<br>271.021(1.9); MS <sup>3</sup> [315.0492]: 300.0288(100.0)                                                                                                                                       |
| <b>M89</b>     | 41.118         | C <sub>22</sub> H <sub>20</sub> O <sub>16</sub> S              | 571.0413              | Isorhamnetin glucuronide sulphate 2 | [M + H] <sup>+</sup> : 573.0551<br>MS <sup>2</sup> [571.0411]: 491.0842(5.07), 411.0694(0.3), 315.0489(100.0),<br>300.0282(31.47), 271.0216(1.94); MS <sup>3</sup> [315.049]: 300.0252(100.0),                                                                                                                   |



|             | tr(min) | Formula                                           | Meas. m/z | Identification                          | Other Ions                              | HRMS <sup>a</sup> (Characteristic Fragment Ions and Their Relative Abundance)                                                                                                                                                                              |
|-------------|---------|---------------------------------------------------|-----------|-----------------------------------------|-----------------------------------------|------------------------------------------------------------------------------------------------------------------------------------------------------------------------------------------------------------------------------------------------------------|
|             |         |                                                   |           |                                         |                                         | 272.0328(4.93), 271.021(1.66), 255.0191(2.21), 243.0344(1.66), 151.0353(3.29)                                                                                                                                                                              |
| <b>M90</b>  | 44.673  | C <sub>22</sub> H <sub>20</sub> O <sub>16</sub> S | 571.0395  | Isorhamnetin glucuronide sulphate 3     |                                         | MS <sup>2</sup> [571.0499]: 491.0803(14.58), 316.0519(18.16), 315.0491(100.0)                                                                                                                                                                              |
| <b>M91</b>  | 45.392  | C <sub>22</sub> H <sub>20</sub> O <sub>16</sub> S | 571.0419  | Isorhamnetin glucuronide sulphate 4     |                                         | MS <sup>2</sup> [571.0425]: 491.0923(4.72), 395.0117(1.58), 315.0478(100.0), 300.024(14.53); MS <sup>3</sup> [315.0476]: 301.0262(24.92), 300.0268(100.0), 283.0162(16.83), 243.0265(20.87), 151.0012(41.75)                                               |
| <b>M92</b>  | 27.987  | C <sub>15</sub> H <sub>10</sub> O <sub>11</sub> S | 396.9882  | Hydroxylated quercetin sulphate 1       | [M + H] <sup>+</sup> : 399.0226         | MS <sup>2</sup> [396.9883]: 317.0295(41.74), 299.0193(28.16), 273.0437(17.99), 258.0207(6.24), 255.0264(10.43), 227.0326(7.49), 211.0391(4.16), 206.9943(24.59), 190.9997(100.0), 183.042(3.31), 175.0027(1.66), 163.0048(32.05)                           |
| <b>M93</b>  | 28.487  | C <sub>15</sub> H <sub>10</sub> O <sub>11</sub> S | 396.9868  | Hydroxylated quercetin sulphate 2       | [M + H] <sup>+</sup> : 398.9855         | MS <sup>2</sup> [396.9902]: 317.0298(54.7), 299.0187(24.85), 273.0326(14.75), 258.0128(4.86), 255.0282(17.0), 227.0323(3.65), 207.0018(26.94), 190.9991(100.0), 179.0029(4.86), 163.0064(20.04), 135.0083(3.65)                                            |
| <b>M94</b>  | 29.028  | C <sub>15</sub> H <sub>10</sub> O <sub>11</sub> S | 396.9876  | Hydroxylated quercetin sulphate 3       | [M + H] <sup>+</sup> : 399.0144         | MS <sup>2</sup> [396.9902]: 317.0281(74.16), 300.0729(4.26), 299.0286(7.41), 273.0359(10.56), 258.0136(7.41), 255.0307(25.43), 231.0285(8.44), 228.0442(6.39), 211.0391(5.32), 208.0002(7.41), 206.994(32.76), 191.0013(100.0), 163.0041(40.13)            |
| <b>M95</b>  | 15.930  | C <sub>21</sub> H <sub>18</sub> O <sub>14</sub>   | 493.0642  | Hydroxylated quercetin glucuronide 1    | [M + HCOOH – H] <sup>+</sup> : 539.1279 | MS <sup>2</sup> [493.0656]: 343.0829(2.42), 317.0289(100.0), 299.0217(26.78), 255.0357(32.73), 207.0024(38.18), 191.0001(88.23); MS <sup>3</sup> [317.0288]: 296.0672(66.67), 227.0228(100.0), 190.9935(66.67)                                             |
| <b>M96</b>  | 17.720  | C <sub>21</sub> H <sub>18</sub> O <sub>14</sub>   | 493.0601  | Hydroxylated quercetin glucuronide 2    | [M + H] <sup>+</sup> : 495.0604         | MS <sup>2</sup> [493.0664]: 317.0277(90.58), 299.0181(21.56), 255.0314(18.18), 206.9961(33.94), 190.9985(100.0), 163.0115(9.09)                                                                                                                            |
| <b>M97</b>  | 39.160  | C <sub>16</sub> H <sub>12</sub> O <sub>11</sub> S | 411.0022  | Hydroxylated isorhamnetin sulphate 1    |                                         | MS <sup>2</sup> [411.0058]: 332.0518(11.57), 331.0425(78.23), 303.0488(100.0), 287.0523(3.17), 275.0529(28.07), 207.001(14.06), 152.0192(2.64); MS <sup>3</sup> [303.049]: 276.0959(15.89), 275.0593(100.0), 260.0211(35.83)                               |
| <b>M98</b>  | 39.710  | C <sub>16</sub> H <sub>12</sub> O <sub>11</sub> S | 411.0043  | Hydroxylated isorhamnetin sulphate 2    | [M + H] <sup>+</sup> : 413.0005         | MS <sup>2</sup> [411.0043]: 331.0433(73.82), 304.0531(8.54), 303.0509(100.0), 287.0604(2.17), 275.0551(35.38), 244.0394(2.17), 151.012(2.17); MS <sup>3</sup> [303.051]: 275.0516(100.0), 259.0317(23.63), 256.0334(13.69)                                 |
| <b>M99</b>  | 40.193  | C <sub>16</sub> H <sub>12</sub> O <sub>11</sub> S | 411.0039  | Hydroxylated isorhamnetin sulphate 3    |                                         | MS <sup>2</sup> [411.0083]: 332.0503(18.28), 331.0462(79.96), 313.022(2.34), 303.0499(100.0), 287.053(7.45), 275.0554(44.52), 151.012(2.34); MS <sup>3</sup> [303.0499]: 275.0553(100.0), 260.0189(34.75), 259.0273(95.74)                                 |
| <b>M100</b> | 59.017  | C <sub>16</sub> H <sub>12</sub> O <sub>11</sub> S | 411.0030  | Hydroxylated isorhamnetin sulphate 4    |                                         | MS <sup>2</sup> [411.0031]: 331.0433(86.27), 313.0341(50.37), 303.0471(100.0), 287.0443(3.73), 233.0641(3.1), 195.0459(2.47), 179.0029(2.47), 175.0403(3.73), 153.0321(2.47); MS <sup>3</sup> [303.0471]: 285.0262(50.48), 175.034(50.48), 153.0204(100.0) |
| <b>M101</b> | 25.103  | C <sub>22</sub> H <sub>20</sub> O <sub>14</sub>   | 507.0790  | Hydroxylated isorhamnetin glucuronide 1 | [M + H] <sup>+</sup> : 509.0944         | MS <sup>2</sup> [507.0858]: 331.0414(60.2), 303.0472(100.0), 275.0568(33.72), 179.0079(27.21); MS <sup>3</sup> [303.0471]: 275.0583(100.0), 260.0342(66.23), 259.0181(83.12)                                                                               |
| <b>M102</b> | 25.728  | C <sub>22</sub> H <sub>20</sub> O <sub>14</sub>   | 507.0758  | Hydroxylated isorhamnetin glucuronide 2 | [M + H] <sup>+</sup> : 509.0874         | N                                                                                                                                                                                                                                                          |

|                        | tr(min) | Formula                                          | Meas. m/z | Identification                          | Other Ions                                                                                 | HRMS <sup>a</sup> (Characteristic Fragment Ions and Their Relative Abundance)                                                                                                                                                                               |
|------------------------|---------|--------------------------------------------------|-----------|-----------------------------------------|--------------------------------------------------------------------------------------------|-------------------------------------------------------------------------------------------------------------------------------------------------------------------------------------------------------------------------------------------------------------|
| <b>M10</b><br><b>3</b> | 26.570  | C <sub>22</sub> H <sub>20</sub> O <sub>14</sub>  | 507.0805  | Hydroxylated isorhamnetin glucuronide 3 | [M + H] <sup>+</sup> : 509.0877                                                            | MS <sup>2</sup> [507.0804]: 475.0432(4.94), 331.0466(98.68), 303.0516(100.0), 275.0573(59.71), 259.0212(6.2), 217.0884(4.94), 179.0013(13.66); MS <sup>3</sup> [303.0516]: 275.0531(100.0)                                                                  |
| <b>M10</b><br><b>4</b> | 40.733  | C <sub>15</sub> H <sub>12</sub> O <sub>6</sub>   | 287.0557  | Eriodictyol                             | [M + H] <sup>+</sup> : 289.0645                                                            | MS <sup>2</sup> [287.0557]: 269.0482(5.27), 241.0493(7.48), 175.034(1.76), 165.0205(100.0), 137.0222(5.97), 135.0046(0.75), 107.0174(0.51)                                                                                                                  |
| <b>M10</b><br><b>5</b> | 49.442  | C <sub>15</sub> H <sub>12</sub> O <sub>6</sub>   | 287.0555  | Dihydrokaempferol                       | [M + H] <sup>+</sup> : 289.0721                                                            | MS <sup>2</sup> [287.0555]: 269.0368(4.63), 259.0621(100.0), 243.0647(4.57), 201.0554(8.75), 173.0683(12.96), 125.0317(17.71); MS <sup>3</sup> [260.0672]: 215.0703(39.08), 173.0659(100.0), 151.0111(15.31), 137.0258(4.83), 125.029(60.18), 107.0076(3.2) |
| <b>M10</b><br><b>6</b> | 37.325  | C <sub>15</sub> H <sub>12</sub> O <sub>9</sub> S | 367.0128  | Eriodictyol-7-O-sulphate                | [M + H] <sup>+</sup> : 369.0350                                                            | MS <sup>2</sup> [367.0125]: 287.0543(41.18), 269.0465(4.37), 165.0219(100.0), 137.0308(4.67)                                                                                                                                                                |
| <b>M10</b><br><b>7</b> | 37.708  | C <sub>15</sub> H <sub>12</sub> O <sub>9</sub> S | 367.0144  | Dihydrokaempferol-7-O-sulphate          | [M + H] <sup>+</sup> : 369.0123<br>[M+HCOOH-H] <sup>-</sup> : 413.0559                     | MS <sup>2</sup> [367.0143]: 287.055(100.0), 269.0496(7.44), 259.0621(95.06), 243.0699(1.87), 165.0203(2.27); MS <sup>3</sup> [287.0548]: 259.0692(100.0), 241.0454(5.36), 215.063(5.36), 125.0216(7.99)                                                     |
| <b>M10</b><br><b>8</b> | 38.200  | C <sub>15</sub> H <sub>12</sub> O <sub>9</sub> S | 367.0144  | Eriodictyol-3'-O-sulphate               | [M + H] <sup>+</sup> : 369.0131<br>[M + CH <sub>3</sub> HCOOH - H] <sup>-</sup> : 427.0378 | MS <sup>2</sup> [367.0143]: 287.0584(100.0), 269.0524(3.42), 165.0203(52.17); MS <sup>3</sup> [287.0584]: 244.913(45.3), 165.027(100.0)                                                                                                                     |
| <b>M10</b><br><b>9</b> | 40.383  | C <sub>15</sub> H <sub>12</sub> O <sub>9</sub> S | 367.0123  | Dihydrokaempferol-4'-O-sulphate         |                                                                                            | MS <sup>2</sup> [367.0121]: 297.0793(5.6), 287.0555(100.0), 269.0922(5.6), 259.0651(95.85), 243.0575(5.6); MS <sup>3</sup> [287.0555]: 259.0719(100.0), 243.0649(44.81)                                                                                     |
| <b>M11</b><br><b>0</b> | 28.045  | C <sub>21</sub> H <sub>20</sub> O <sub>12</sub>  | 463.0907  | Dehydroxylated taxifolin glucuronide 1  | [M + H] <sup>+</sup> : 465.0951                                                            | N                                                                                                                                                                                                                                                           |
| <b>M11</b><br><b>1</b> | 28.753  | C <sub>21</sub> H <sub>20</sub> O <sub>12</sub>  | 463.0856  | Dehydroxylated taxifolin glucuronide 2  | [M + H] <sup>+</sup> : 465.1055                                                            | N                                                                                                                                                                                                                                                           |
| <b>M11</b><br><b>2</b> | 28.970  | C <sub>21</sub> H <sub>20</sub> O <sub>12</sub>  | 463.0888  | Dihydrokaempferol 4'-O-glucuronide      | [M + H] <sup>+</sup> : 465.0837                                                            | MS <sup>2</sup> [463.0889]: 329.0731(10.11), 301.0674(17.49), 287.0565(77.45), 259.0566(100.0), 221.0609(12.54)                                                                                                                                             |
| <b>M11</b><br><b>3</b> | 16.017  | C <sub>21</sub> H <sub>18</sub> O <sub>12</sub>  | 478.1007  | Luteolin-7-O- glucuronide               | [M + NH <sub>4</sub> ] <sup>+</sup> : 480.1114                                             | MS <sup>2</sup> [478.1044]: 461.0707(17.38), 285.0386(100.0), 223.0349(1.78), 217.0536(2.54), 175.0423(1.52); MS <sup>3</sup> [285.0386]: 175.034(100.0)                                                                                                    |
| <b>M11</b><br><b>4</b> | 16.525  | C <sub>21</sub> H <sub>18</sub> O <sub>12</sub>  | 478.1007  | Luteolin-3'/4'-O-glucuronide            | [M + NH <sub>4</sub> ] <sup>+</sup> : 480.1122                                             | MS <sup>2</sup> [478.1031]: 461.0765(14.77), 285.0408(100.0), 241.0527(1.75), 217.0548(2.98), 177.0255(5.34), 175.044(2.46), 163.0078(4.04); MS <sup>3</sup> [285.0408]: 199.0339(76.0), 177.0318(100.0)                                                    |
| <b>M11</b><br><b>5</b> | 17.425  | C <sub>21</sub> H <sub>18</sub> O <sub>12</sub>  | 478.1014  | Luteolin-3'/4'-O-glucuronide            | [M + NH <sub>4</sub> ] <sup>+</sup> : 480.1120                                             | MS <sup>2</sup> [478.1014]: 461.0754(20.56), 285.0374(100.0), 241.0573(4.06), 217.0502(5.89), 177.0169(3.99), 175.044(1.34); MS <sup>3</sup> [285.0374]: 243.0492(49.84), 239.0645(49.84), 217.0575(100.0), 175.034(49.84), 163.0311(33.87)                 |
| <b>M11</b><br><b>6</b> | 23.962  | C <sub>22</sub> H <sub>20</sub> O <sub>12</sub>  | 492.1165  | Methyl luteolin glucuronide             | [M + NH <sub>4</sub> ] <sup>+</sup> : 494.1282                                             | MS <sup>2</sup> [492.1144]: 475.0829(30.71), 299.0511(100.0), 284.0283(9.33); MS <sup>3</sup> [299.0498]: 284.0412(100.0), 256.027(35.16), 188.0416(35.16)                                                                                                  |

|                        | tr(min) | Formula                                           | Meas. m/z | Identification                              | Other Ions                                                                                | HRMS <sup>a</sup> (Characteristic Fragment Ions and Their Relative Abundance)                                                                                                                                                                                                                                  |
|------------------------|---------|---------------------------------------------------|-----------|---------------------------------------------|-------------------------------------------------------------------------------------------|----------------------------------------------------------------------------------------------------------------------------------------------------------------------------------------------------------------------------------------------------------------------------------------------------------------|
| <b>M11</b><br><b>7</b> | 43.883  | C <sub>15</sub> H <sub>14</sub> O <sub>7</sub>    | 305.0652  | Hydrogenated taxifolin                      | [M + H] <sup>+</sup> : 307.0816                                                           | MS <sup>2</sup> [305.2124]: 287.0565(27.3), 243.0639(5.84), 183.0309(84.98), 165.0249(21.98), 161.0287(19.64), 137.0301(10.2), 125.0274(100.0); MS <sup>3</sup> [287.0565]: 174.0706(14.4), 161.0202(57.2), 125.0275(100.0)                                                                                    |
| <b>M11</b><br><b>8</b> | 52.325  | C <sub>16</sub> H <sub>16</sub> O <sub>7</sub>    | 319.0813  | Hydrogenated methyl taxifolin               | [M + H] <sup>+</sup> : 321.0935                                                           | MS <sup>2</sup> [319.0794]: 317.073(2.11), 301.0722(7.8), 289.0676(13.17), 239.0889(9.24), 221.0862(10.03), 165.0267(30.46), 164.0131(100.0), 125.0282(23.45)                                                                                                                                                  |
| <b>M11</b><br><b>9</b> | 38.567  | C <sub>15</sub> H <sub>14</sub> O <sub>10</sub> S | 385.0224  | Hydrogenated taxifolin sulphate 1           |                                                                                           | MS <sup>2</sup> [385.0225]: 305.0606(100.0), 303.0496(2.04), 287.058(14.45), 183.0371(49.64), 161.029(8.54), 125.0286(8.04); MS <sup>3</sup> [305.0605]: 183.0274(100.0)                                                                                                                                       |
| <b>M12</b><br><b>0</b> | 43.433  | C <sub>15</sub> H <sub>14</sub> O <sub>10</sub> S | 385.0224  | Hydrogenated taxifolin sulphate 2           | [M + H] <sup>+</sup> : 387.0402                                                           | MS <sup>2</sup> [385.0226]: 305.0639(100.0), 287.0531(34.27), 183.0313(74.2), 179.037(5.95), 165.0221(16.19), 161.0286(18.96), 125.0318(28.64); MS <sup>3</sup> [305.0638]: 219.0603(13.22), 183.028(81.64), 137.0244(14.5), 125.0307(100.0), 123.0563(5.33)                                                   |
| <b>M12</b><br><b>1</b> | 45.442  | C <sub>15</sub> H <sub>14</sub> O <sub>10</sub> S | 385.0227  | Hydrogenated taxifolin sulphate 3           | [M + H] <sup>+</sup> : 387.0354                                                           | MS <sup>2</sup> [385.0228]: 305.0635(100.0), 303.0609(3.84), 287.0568(36.85), 221.0473(19.37), 183.0345(56.85), 165.0244(19.71), 161.0269(14.49), 125.0305(20.95); MS <sup>3</sup> [305.0634]: 272.8169(13.6), 221.0411(13.6), 183.0361(81.21), 177.0444(13.6), 160.964(13.6), 134.7956(13.6), 125.0263(100.0) |
| <b>M12</b><br><b>2</b> | 35.317  | C <sub>9</sub> H <sub>10</sub> O <sub>3</sub>     | 165.0555  | 3/4-Hydroxyphenylpropionic acid             | [M + HCOOH - H] <sup>-</sup> : 211.0672                                                   | N                                                                                                                                                                                                                                                                                                              |
| <b>M12</b><br><b>3</b> | 35.917  | C <sub>9</sub> H <sub>10</sub> O <sub>3</sub>     | 165.0570  | 3/4-Hydroxyphenylpropionic acid             | [M + H] <sup>+</sup> : 167.0834<br>[M + HCOOH - H] <sup>-</sup> : 211.0611                | MS <sup>2</sup> [165.0566]: 121.0738(100.0), 119.0403(5.32), 106.0355(5.32)                                                                                                                                                                                                                                    |
| <b>M12</b><br><b>4</b> | 21.712  | C <sub>9</sub> H <sub>10</sub> O <sub>6</sub> S   | 245.0132  | 4-Hydroxyphenylpropionic acid sulphate      | [M + H] <sup>+</sup> : 247.0623<br>[M + CH <sub>3</sub> COOH - H] <sup>-</sup> : 305.0807 | MS <sup>2</sup> [245.0085]: 165.058(100.0), 121.0659(51.43), 118.9012(2.54)                                                                                                                                                                                                                                    |
| <b>M12</b><br><b>5</b> | 23.683  | C <sub>9</sub> H <sub>10</sub> O <sub>6</sub> S   | 245.0133  | 3-Hydroxyphenylpropionic acid sulphate      | [M + H] <sup>+</sup> : 247.0701                                                           | MS <sup>2</sup> [245.0133]: 165.058(70.75), 121.0704(100.0), 119.054(20.97); MS <sup>3</sup> [165.0581]: 121.0892(100.0)                                                                                                                                                                                       |
| <b>M12</b><br><b>6</b> | 23.787  | C <sub>15</sub> H <sub>18</sub> O <sub>9</sub>    | 341.0866  | 3/4-Hydroxyphenylpropionic acid glucuronide | [M + H] <sup>+</sup> : 343.0897                                                           | N                                                                                                                                                                                                                                                                                                              |
| <b>M12</b><br><b>7</b> | 24.078  | C <sub>15</sub> H <sub>18</sub> O <sub>9</sub>    | 341.0891  | 3/4-Hydroxyphenylpropionic acid glucuronide | [M+H] <sup>+</sup> : 343.0984                                                             | MS <sup>2</sup> [341.0891]: 323.0638(39.84), 319.516(60.16), 285.0357(39.84), 175.0225(60.16), 165.0477(60.16), 121.0641(100.0)                                                                                                                                                                                |
| <b>M12</b><br><b>8</b> | 22.325  | C <sub>9</sub> H <sub>8</sub> O <sub>6</sub> S    | 242.9969  | <i>p/m</i> -Coumaric acid sulphate          | [M + H] <sup>+</sup> : 245.1021                                                           | MS <sup>2</sup> [242.9968]: 199.0183(2.83), 163.0435(100.0), 119.0546(42.98)                                                                                                                                                                                                                                   |
| <b>M12</b><br><b>9</b> | 25.758  | C <sub>9</sub> H <sub>8</sub> O <sub>6</sub> S    | 242.9972  | <i>p/m</i> -Coumaric acid sulphate          | [M + H] <sup>+</sup> : 245.0905                                                           | MS <sup>2</sup> [242.9999]: 163.0438(100.0), 119.0602(17.51)                                                                                                                                                                                                                                                   |
| <b>M13</b><br><b>0</b> | 27.067  | C <sub>9</sub> H <sub>8</sub> O <sub>6</sub> S    | 242.9971  | <i>p/m</i> -Coumaric acid sulphate          |                                                                                           | MS <sup>2</sup> [242.9971]: 163.0429(100.0), 119.0548(18.77); MS <sup>3</sup> [163.0429]: 119.0495(100.0)                                                                                                                                                                                                      |
| <b>M13</b><br><b>1</b> | 16.490  | C <sub>8</sub> H <sub>8</sub> O <sub>4</sub>      | 167.0349  | Dihydroxyphenylacetic acid                  | [M + H] <sup>+</sup> : 169.0487                                                           | MS <sup>2</sup> [167.0352]: 123.0458(100.0)                                                                                                                                                                                                                                                                    |

|                        | tr(min) | Formula                                          | Meas. m/z | Identification                                  | Other Ions                                                                    | HRMS <sup>a</sup> (Characteristic Fragment Ions and Their Relative Abundance)                                                                                                                                     |
|------------------------|---------|--------------------------------------------------|-----------|-------------------------------------------------|-------------------------------------------------------------------------------|-------------------------------------------------------------------------------------------------------------------------------------------------------------------------------------------------------------------|
| <b>M13</b><br><b>2</b> | 16.258  | C <sub>8</sub> H <sub>8</sub> O <sub>7</sub> S   | 246.9927  | Dihydroxyphenylacetic acid sulfae 1             | [M + HCOOH – H] <sup>-</sup> :<br>293.0782                                    | MS <sup>2</sup> [246.9926]: 203.0035(98.33), 167.0337(3.62), 123.0502(100.0),<br>96.9592(2.41), 80.9685(2.41)                                                                                                     |
| <b>M13</b><br><b>3</b> | 15.800  | C <sub>8</sub> H <sub>8</sub> O <sub>7</sub> S   | 246.9927  | Dihydroxyphenylacetic acid sulfae 2             | [M + H] <sup>+</sup> : 249.0907 [M +<br>HCOOH – H] <sup>-</sup> : 293.0674    | MS <sup>2</sup> [246.9927]: 203.0043(40.61), 167.1071(4.54), 123.047(100.0),<br>96.9592(7.65)                                                                                                                     |
| <b>M13</b><br><b>4</b> | 16.933  | C <sub>8</sub> H <sub>8</sub> O <sub>7</sub> S   | 246.9920  | Dihydroxyphenylacetic acid sulfae 3             | [M + HCOOH – H] <sup>-</sup> :<br>293.0765                                    | MS <sup>2</sup> [246.9921]: 203.0052(25.11), 123.0481(100.0), 104.9069(4.22),<br>96.9592(6.37)                                                                                                                    |
| <b>M13</b><br><b>5</b> | 18.108  | C <sub>9</sub> H <sub>10</sub> O <sub>7</sub> S  | 261.0073  | Homovanillic acid sulphate                      |                                                                               | MS <sup>2</sup> [261.0072]: 217.0189(60.08), 181.0569(100.0), 137.0659(69.26),<br>122.0471(14.26), 107.0468(0.79); MS <sup>3</sup> [181.057]: 137.0775(100.0),<br>123.052(28.58), 122.0393(23.29)                 |
| <b>M13</b><br><b>6</b> | 22.508  | C <sub>9</sub> H <sub>10</sub> O <sub>4</sub>    | 181.0504  | Dihydrocaffeic acid                             | [M + H] <sup>+</sup> : 183.0802<br>[M + HCOOH – H] <sup>-</sup> :<br>227.0506 | MS <sup>2</sup> [181.0504]: 137.0642(100.0)                                                                                                                                                                       |
| <b>M13</b><br><b>7</b> | 20.033  | C <sub>9</sub> H <sub>10</sub> O <sub>7</sub> S  | 261.0082  | Dihydrocaffeic acid sulphate 1                  | [M + H] <sup>+</sup> : 263.0382                                               | MS <sup>2</sup> [261.0082]: 217.0208(8.69), 181.0563(77.44), 137.0644(100.0),<br>119.1207(2.90)                                                                                                                   |
| <b>M13</b><br><b>8</b> | 20.942  | C <sub>9</sub> H <sub>10</sub> O <sub>7</sub> S  | 261.0084  | Dihydrocaffeic acid sulphate 2                  |                                                                               | MS <sup>2</sup> [261.0085]: 181.0559(100.0), 137.0673(55.09), 119.0552(5.14);<br>MS <sup>3</sup> [181.0559]: 137.059(100.0), 107.9501(66.67)                                                                      |
| <b>M13</b><br><b>9</b> | 13.108  | C <sub>11</sub> H <sub>13</sub> NO <sub>5</sub>  | 238.0720  | Caffeic acid acetamide 1                        | [M + H] <sup>+</sup> : 240.0842                                               | MS <sup>2</sup> [238.072]: 179.0431(100.0), 176.0566(22.08), 152.0729(22.08),<br>135.042(55.63), 123.0528(33.33)                                                                                                  |
| <b>M14</b><br><b>0</b> | 13.592  | C <sub>11</sub> H <sub>13</sub> NO <sub>5</sub>  | 238.0724  | Caffeic acid acetamide 2                        | [M + H] <sup>+</sup> : 240.0925                                               | MS <sup>2</sup> [238.0762]: 198.0597(49.02), 196.0722(49.02), 179.06(49.02),<br>176.0705(61.76), 135.0555(100.0)                                                                                                  |
| <b>M14</b><br><b>1</b> | 13.858  | C <sub>11</sub> H <sub>13</sub> NO <sub>5</sub>  | 238.0728  | Caffeic acid acetamide 3                        | [M + H] <sup>+</sup> : 240.0822                                               | MS <sup>2</sup> [238.0729]: 220.0566(23.69), 196.0632(94.08), 179.0505(100.0),<br>161.0541(35.54), 135.0502(53.3), 122.1231(23.69), 107.8813(23.69)                                                               |
| <b>M14</b><br><b>2</b> | 11.692  | C <sub>9</sub> H <sub>10</sub> O <sub>5</sub>    | 197.0461  | 3-(3,4-Dihydroxyphenyl)-3-hydroxypropanoic acid | [M + H] <sup>+</sup> : 199.0994                                               | MS <sup>2</sup> [197.0486]: 179.0378(65.39), 135.0627(100.0)                                                                                                                                                      |
| <b>M14</b><br><b>3</b> | 12.658  | C <sub>9</sub> H <sub>10</sub> O <sub>5</sub>    | 197.0456  | 3-(3,4-Dihydroxyphenyl)-2-hydroxypropanoic acid | [M + H] <sup>+</sup> : 199.0860                                               | MS <sup>2</sup> [197.0482]: 179.0353(100.0), 135.0474(18.06)                                                                                                                                                      |
| <b>M14</b><br><b>4</b> | 12.700  | C <sub>9</sub> H <sub>10</sub> O <sub>8</sub> S  | 277.0024  | Caffeic acid hydrated sulphate 1                | [M + HCOOH – H] <sup>-</sup> :<br>323.0367                                    | MS <sup>2</sup> [277.0025]: 258.9906(3.42), 230.9964(29.18), 214.9979(28.31),<br>197.0456(100.0), 179.0362(75.84), 151.0353(2.75), 149.0285(2.75),<br>135.0497(46.29), 123.048(14.48), 107.0517(2.75)             |
| <b>M14</b><br><b>5</b> | 13.433  | C <sub>9</sub> H <sub>10</sub> O <sub>8</sub> S  | 277.0025  | Caffeic acid hydrated sulphate 2                | [M + HCOOH – H] <sup>-</sup> :<br>323.0610                                    | MS <sup>2</sup> [277.0027]: 258.9884(6.27), 215.0035(41.39), 197.0484(86.06),<br>179.0394(100.0), 151.0403(4.02), 135.0514(78.31), 123.0497(4.57),<br>107.0664(2.29); MS <sup>3</sup> [179.0394]: 135.0486(100.0) |
| <b>M14</b><br><b>6</b> | 22.667  | C <sub>10</sub> H <sub>12</sub> O <sub>7</sub> S | 275.0236  | Dihydrogen ferulic acid sulphate                |                                                                               | MS <sup>2</sup> [275.0236]: 195.0681(100.0), 151.0845(14.67), 149.0632(1.61),<br>136.0607(25.99), 119.0578(12.43)                                                                                                 |
| <b>M14</b><br><b>7</b> | 15.810  | C <sub>10</sub> H <sub>12</sub> O <sub>8</sub> S | 291.0191  | Ferulic acid hydratedsulphate 1                 | [M + H] <sup>+</sup> : 293.0529                                               | MS <sup>2</sup> [291.0162]: 245.0016(5.26), 229.0245(5.26), 211.0622(100.0),<br>193.0556(92.66), 165.0517(4.21), 150.0371(4.21), 149.0654(5.26),<br>134.0406(35.58), 107.0624(4.21)                               |
| <b>M14</b><br><b>8</b> | 16.233  | C <sub>10</sub> H <sub>12</sub> O <sub>8</sub> S | 291.0184  | Ferulic acid hydratedsulphate 2                 |                                                                               | MS <sup>2</sup> [291.0231]: 229.0105(18.43), 211.0577(36.68), 193.0594(100.0),<br>165.0568(27.64), 134.0369(68.74)                                                                                                |

|                        | tr(min) | Formula                                           | Meas. m/z | Identification                                            | Other Ions                                          | HRMS <sup>a</sup> (Characteristic Fragment Ions and Their Relative Abundance)                                                                                                                                                                                 |
|------------------------|---------|---------------------------------------------------|-----------|-----------------------------------------------------------|-----------------------------------------------------|---------------------------------------------------------------------------------------------------------------------------------------------------------------------------------------------------------------------------------------------------------------|
| <b>M14</b><br><b>9</b> | 25.208  | C <sub>7</sub> H <sub>8</sub> O <sub>5</sub> S    | 203.0021  | Hydroxybenzyl alcohol sulphate                            |                                                     | MS <sup>2</sup> [203.0021]: 123.0532(100.0), 80.9599(1.6), 79.9639(3.98)                                                                                                                                                                                      |
| <b>M15</b><br><b>0</b> | 29.025  | C <sub>13</sub> H <sub>16</sub> O <sub>8</sub>    | 299.0773  | Hydroxybenzyl alcohol glucuronide<br>1                    | [M + H] <sup>+</sup> : 301.0777                     | MS <sup>2</sup> [299.0773]: 283.0312(21.37), 175.0225(100.0), 160.2379(21.37), 127.583(31.85), 123.0572(89.52), 113.0266(84.27)                                                                                                                               |
| <b>M15</b><br><b>1</b> | 29.717  | C <sub>13</sub> H <sub>16</sub> O <sub>8</sub>    | 299.0771  | Hydroxybenzyl alcohol glucuronide<br>2                    | [M + H] <sup>+</sup> : 301.0752                     | MS <sup>2</sup> [299.0772]: 175.0269(100.0), 123.05(53.08), 113.0296(87.01)                                                                                                                                                                                   |
| <b>M15</b><br><b>2</b> | 18.795  | C <sub>13</sub> H <sub>16</sub> O <sub>11</sub> S | 379.0336  | Hydroxybenzyl alcohol glucuronide<br>sulphate 1           | [M + Na] <sup>+</sup> : 403.0538                    | MS <sup>2</sup> [379.0367]: 299.073(13.22), 280.5353(13.22), 204.0215(26.43), 203.003(100.0), 182.9267(13.22), 175.0215(13.22)                                                                                                                                |
| <b>M15</b><br><b>3</b> | 21.095  | C <sub>13</sub> H <sub>16</sub> O <sub>11</sub> S | 379.0337  | Hydroxybenzyl alcohol glucuronide<br>sulphate 2           | [M + Na] <sup>+</sup> : 403.0728                    | MS <sup>2</sup> [379.0337]: 325.2361(3.3), 299.073(4.86), 203.0028(100.0), 175.034(3.3), 159.0413(3.3), 123.0458(8.17)                                                                                                                                        |
| <b>M15</b><br><b>4</b> | 33.083  | C <sub>8</sub> H <sub>10</sub> O <sub>5</sub> S   | 217.0168  | Methyl hydroxybenzyl alcohol<br>sulphate 1                | [M + HCOOH – H] <sup>-</sup> :<br>263.0667          | MS <sup>2</sup> [217.0198]: 201.9975(9.57), 137.0699(88.45), 122.0442(100.0), 79.9576(9.57)                                                                                                                                                                   |
| <b>M15</b><br><b>5</b> | 34.625  | C <sub>8</sub> H <sub>10</sub> O <sub>5</sub> S   | 217.0181  | Methyl hydroxybenzyl alcohol<br>sulphate 2                | [M + HCOOH – H] <sup>-</sup> :<br>263.0530          | MS <sup>2</sup> [217.0181]: 202.0013(8.38), 137.0652(98.69), 122.0346(100.0)                                                                                                                                                                                  |
| <b>M15</b><br><b>6</b> | 17.512  | C <sub>7</sub> H <sub>6</sub> O <sub>6</sub> S    | 216.9822  | 3/4-Hydroxy benzoic acid sulphate                         |                                                     | MS <sup>2</sup> [216.9822]: 137.0291(100.0)                                                                                                                                                                                                                   |
| <b>M15</b><br><b>7</b> | 17.937  | C <sub>7</sub> H <sub>6</sub> O <sub>6</sub> S    | 216.9810  | 3/4-Hydroxy benzoic acid sulphate                         | [M + 2H <sub>2</sub> O – H] <sup>-</sup> : 252.9380 | MS <sup>2</sup> [216.9765]: 137.0236(100.0)                                                                                                                                                                                                                   |
| <b>M15</b><br><b>8</b> | 30.987  | C <sub>8</sub> H <sub>8</sub> O <sub>7</sub> S    | 246.9914  | Vanillic acid sulphate                                    |                                                     | MS <sup>2</sup> [246.991]: 167.0362(100.0), 152.0208(2.6), 137.0317(2.6), 110.9775(2.6), 108.0293(2.6); MS <sup>3</sup> [168.0317]: 152.0077(100.0)                                                                                                           |
| <b>M15</b><br><b>9</b> | 31.978  | C <sub>8</sub> H <sub>8</sub> O <sub>7</sub> S    | 246.9909  | Isovanillic acid sulphate                                 |                                                     | MS <sup>2</sup> [246.9898]: 167.0427(100.0), 152.0253(11.02), 110.978(3.24)                                                                                                                                                                                   |
| <b>M16</b><br><b>0</b> | 61.342  | C <sub>31</sub> H <sub>24</sub> O <sub>13</sub>   | 603.1151  | Dimer of taxifolin and<br>dehydroxylated methyl taxifolin | [M + H] <sup>+</sup> : 605.1226                     | MS <sup>2</sup> [603.1152]: 429.0094(2.05), 315.0449(6.63), 303.0557(4.08), 299.0515(36.21), 297.0388(100.0), 285.0433(33.47), 269.0479(29.94), 253.0522(25.92), 241.0552(13.28), 227.0355(28.46); MS <sup>3</sup> [297.0388]: 227.0299(100.0)                |
| <b>M16</b><br><b>1</b> | 55.533  | C <sub>31</sub> H <sub>24</sub> O <sub>14</sub>   | 619.1063  | Dimer of taxifolin and methyl<br>taxifolin 1              | [M + H] <sup>+</sup> : 621.1186                     | MS <sup>2</sup> [619.106]: 315.046(15.33), 303.0519(7.41), 297.0383(100.0), 285.0391(34.96), 241.0485(6.04), 227.036(29.0); MS <sup>3</sup> [297.0383]: 279.0147(26.67), 269.0446(40.0), 255.0191(26.67), 253.0569(26.67), 235.0548(26.67), 227.0384(100.0)   |
| <b>M16</b><br><b>2</b> | 60.600  | C <sub>31</sub> H <sub>24</sub> O <sub>14</sub>   | 619.1090  | Dimer of taxifolin and methyl<br>taxifolin 2              | [M + H] <sup>+</sup> : 621.1206                     | MS <sup>2</sup> [619.1091]: 315.0475(16.72), 303.0475(4.28), 297.0383(100.0), 285.0371(30.42), 269.0421(8.15), 241.0586(9.68), 227.0328(25.51); MS <sup>3</sup> [297.0383]: 269.0368(11.99), 253.0486(21.7), 241.0552(11.99), 227.031(100.0), 225.0485(11.99) |
| <b>M16</b><br><b>3</b> | 64.608  | C <sub>32</sub> H <sub>26</sub> O <sub>14</sub>   | 633.1249  | Dimer of taxifolin and dimethyl<br>taxifolin              | [M + H] <sup>+</sup> : 635.1386                     | MS <sup>2</sup> [633.1249]: 330.0702(14.17), 329.0637(15.62), 303.0496(8.48), 297.0395(100.0), 285.0388(39.82), 269.0446(11.27), 241.0517(9.87), 227.0345(35.53), 197.0614(11.27)                                                                             |
| <b>M16</b><br><b>4</b> | 56.025  | C <sub>31</sub> H <sub>24</sub> O <sub>17</sub> S | 699.0699  | Dimer of taxifolin and methyl<br>taxifolin sulphate 1     | [M + H] <sup>+</sup> : 701.0665                     | MS <sup>2</sup> [699.0759]: 619.1047(19.07), 601.093(1.74), 383.0133(5.56), 315.0472(34.65), 303.044(3.82), 297.0376(100.0), 285.0378(28.94),                                                                                                                 |

|                        | tr(min) | Formula                                           | Meas. m/z | Identification                                                  | Other Ions                      | HRMS <sup>a</sup> (Characteristic Fragment Ions and Their Relative Abundance)                                                                                                                                                                                                                                                                                     |
|------------------------|---------|---------------------------------------------------|-----------|-----------------------------------------------------------------|---------------------------------|-------------------------------------------------------------------------------------------------------------------------------------------------------------------------------------------------------------------------------------------------------------------------------------------------------------------------------------------------------------------|
|                        |         |                                                   |           |                                                                 |                                 | 241.0454(8.53), 227.0367(23.27); MS <sup>3</sup> [297.0375]: 269.0446(57.14), 255.0251(71.43), 227.0289(100.0)                                                                                                                                                                                                                                                    |
| <b>M16</b><br><b>5</b> | 56.750  | C <sub>31</sub> H <sub>24</sub> O <sub>17</sub> S | 699.0671  | Dimer of taxifolin and methyl taxifolin sulphate 2              |                                 | MS <sup>2</sup> [699.0674]: 619.1041(55.56), 601.093(1.27), 315.0477(44.86), 303.0496(2.13), 297.0371(100.0), 285.0377(17.5), 241.0503(2.57), 227.0361(10.34); MS <sup>3</sup> [297.037]: 227.0386(100.0)                                                                                                                                                         |
| <b>M16</b><br><b>6</b> | 60.817  | C <sub>31</sub> H <sub>24</sub> O <sub>17</sub> S | 699.0678  | Dimer of taxifolin and methyl taxifolin sulphate 3              | [M + H] <sup>+</sup> : 701.0781 | MS <sup>2</sup> [699.0706]: 619.106(15.71), 383.0068(5.18), 315.0466(31.98), 303.0475(11.98), 297.0376(100.0), 285.0367(31.91), 241.0495(6.36), 227.0356(19.51); MS <sup>3</sup> [297.0375]: 269.0444(19.89), 255.0327(20.25), 227.034(100.0), 225.0544(17.46), 197.0547(6.34), 173.0235(5.92)                                                                    |
| <b>M16</b><br><b>7</b> | 59.725  | C <sub>32</sub> H <sub>26</sub> O <sub>17</sub> S | 713.0844  | Dimer of taxifolin and dimethyl taxifolin sulphate 1            | [M + H] <sup>+</sup> : 715.0883 | MS <sup>2</sup> [713.0846]: 633.121(78.77), 395.0105(1.13), 383.0081(1.33), 330.0682(9.95), 329.064(55.43), 317.0642(29.04), 315.0486(34.88), 303.0436(9.74), 301.0732(7.27), 299.0485(0.76), 298.0384(15.99), 297.0387(100.0), 289.0666(6.5), 285.0448(30.95), 269.0458(4.0), 253.0477(4.4), 241.0479(7.26), 227.0358(17.51)                                     |
| <b>M16</b><br><b>8</b> | 60.167  | C <sub>32</sub> H <sub>26</sub> O <sub>17</sub> S | 713.0839  | Dimer of taxifolin and dimethyl taxifolin sulphate 2            | [M + H] <sup>+</sup> : 715.0630 | MS <sup>2</sup> [713.084]: 633.1203(100.0), 329.0637(10.29), 315.0486(30.08), 303.0451(6.63), 297.0403(69.79), 289.0534(0.63), 285.0382(8.55), 227.0323(7.8); MS <sup>3</sup> [633.1202]: 329.0628(15.18), 315.0526(9.1), 303.0331(6.03), 301.058(6.03), 297.0399(100.0), 285.0469(46.0), 269.0601(6.03), 241.0559(10.57), 227.0344(24.22), 199.1007(6.03)        |
| <b>M16</b><br><b>9</b> | 64.125  | C <sub>32</sub> H <sub>26</sub> O <sub>17</sub> S | 713.0843  | Dimer of taxifolin and dimethyl taxifolin sulphate 3            | [M + H] <sup>+</sup> : 715.0977 | MS <sup>2</sup> [713.0842]: 633.1208(54.36), 330.0683(5.99), 329.0632(22.97), 317.0634(9.76), 315.047(29.92), 303.0488(10.78), 298.0414(21.45), 297.0382(100.0), 285.0372(21.79), 269.0441(8.23), 227.0363(9.55); MS <sup>3</sup> [297.0382]: 269.0498(41.76), 255.0307(19.55), 253.0517(28.29), 241.0527(5.45), 227.0335(100.0), 225.0544(26.44), 211.0461(7.71) |
| <b>M17</b><br><b>0</b> | 60.650  | C <sub>32</sub> H <sub>26</sub> O <sub>13</sub>   | 617.1291  | Dimer of methyl taxifolin and dehydroxylated methyl taxifolin 1 | [M + H] <sup>+</sup> : 619.1473 | MS <sup>2</sup> [617.1266]: 329.0627(100.0), 313.0705(58.45), 299.0496(27.28), 297.0278(94.74), 227.0285(19.48), 217.0047(15.59)                                                                                                                                                                                                                                  |
| <b>M17</b><br><b>1</b> | 64.400  | C <sub>32</sub> H <sub>26</sub> O <sub>13</sub>   | 617.1311  | Dimer of methyl taxifolin and dehydroxylated methyl taxifolin 2 | [M + H] <sup>+</sup> : 619.1407 | MS <sup>2</sup> [617.1313]: 330.0665(13.11), 329.0643(100.0), 317.0627(34.37), 301.0707(16.82), 300.0566(15.75), 299.052(71.1), 289.0705(27.38), 285.0742(15.72), 281.0495(21.43); MS <sup>3</sup> [329.0643]: 270.0552(31.07), 136.0354(100.0)                                                                                                                   |
| <b>M17</b><br><b>2</b> | 64.925  | C <sub>32</sub> H <sub>26</sub> O <sub>13</sub>   | 617.1299  | Dimer of methyl taxifolin and dehydroxylated methyl taxifolin 3 | [M + H] <sup>+</sup> : 619.1315 | MS <sup>2</sup> [617.1281]: 313.0705(54.0), 304.056(4.69), 301.0727(15.12), 297.0385(100.0), 285.0434(44.87), 269.0509(5.82), 241.0527(6.95), 227.0386(34.84), 211.0336(6.95), 189.0484(6.95); MS <sup>3</sup> [297.0385]: 227.0656(100.0), 227.0299(66.67)                                                                                                       |
| <b>M17</b><br><b>3</b> | 65.142  | C <sub>32</sub> H <sub>24</sub> O <sub>14</sub>   | 631.1093  | Dimer of methyl quercetin and methyl taxifolin 1                | [M + H] <sup>+</sup> : 633.1569 | MS <sup>2</sup> [631.1112]: 615.115(8.3), 509.0973(100.0), 495.0759(7.37), 343.0303(5.51), 329.0608(47.85), 317.0621(15.64), 315.0491(25.73), 314.0673(5.55), 313.0713(24.84), 303.0496(3.72), 301.058(3.72), 299.073(7.44), 297.0398(34.1), 289.0695(7.37), 285.0367(26.48), 241.0454(3.72)                                                                      |

|                        | tr(min) | Formula                                         | Meas. <i>m/z</i> | Identification                                                    | Other Ions                                          | HRMS <sup>a</sup> (Characteristic Fragment Ions and Their Relative Abundance)                                                                                                                                                                                                                              |
|------------------------|---------|-------------------------------------------------|------------------|-------------------------------------------------------------------|-----------------------------------------------------|------------------------------------------------------------------------------------------------------------------------------------------------------------------------------------------------------------------------------------------------------------------------------------------------------------|
| <b>M17</b><br><b>4</b> | 66.142  | C <sub>32</sub> H <sub>24</sub> O <sub>14</sub> | 631.1088         | Dimer of methyl quercetin and methyl taxifolin 2                  | [M + H] <sup>+</sup> : 633.1517                     | MS <sup>2</sup> [631.1091]: 329.0633(17.71), 317.0641(7.07), 313.0317(100.0), 301.048(23.97), 289.0635(2.99), 285.0811(2.63), 241.0567(7.08), 213.0424(2.25), 207.0355(2.25); MS <sup>3</sup> [313.0317]: 269.0368(85.08), 241.0454(57.46), 198.0331(85.08), 175.0027(85.08), 163.0035(100.0)              |
| <b>M17</b><br><b>5</b> | 68.517  | C <sub>32</sub> H <sub>24</sub> O <sub>14</sub> | 631.1106         | Dimer of methyl quercetin and methyl taxifolin 3                  | [M + H] <sup>+</sup> : 633.1196                     | MS <sup>2</sup> [631.1107]: 479.0975(5.04), 355.0434(7.47), 329.068(100.0), 317.0679(22.55), 313.0345(21.29), 301.0495(70.28), 289.0695(25.02), 285.0502(5.04), 257.0648(7.47), 241.0454(9.99)                                                                                                             |
| <b>M17</b><br><b>6</b> | 69.230  | C <sub>32</sub> H <sub>24</sub> O <sub>14</sub> | 631.1105         | Dimer of methyl quercetin and methyl taxifolin 4                  | [M + H] <sup>+</sup> : 633.1162                     | MS <sup>2</sup> [631.1044]: 453.0727(6.78), 369.0622(6.78), 327.0433(13.64), 315.0606(36.03), 300.0175(9.05), 297.0385(100.0), 285.0415(37.54), 227.0317(18.23)                                                                                                                                            |
| <b>M17</b><br><b>7</b> | 64.550  | C <sub>33</sub> H <sub>28</sub> O <sub>13</sub> | 631.1435         | Dimer of methyl taxifolin and dehydroxylated dimethyl taxifolin 1 | [M + H] <sup>+</sup> : 633.1605                     | MS <sup>2</sup> [631.1416]: 329.0634(88.41), 324.0928(33.48), 317.0646(44.21), 313.0722(100.0), 301.0662(33.48)                                                                                                                                                                                            |
| <b>M17</b><br><b>8</b> | 67.408  | C <sub>33</sub> H <sub>28</sub> O <sub>13</sub> | 631.1482         | Dimer of methyl taxifolin and dehydroxylated dimethyl taxifolin 2 | [M + H] <sup>+</sup> : 633.1335                     | MS <sup>2</sup> [631.1483]: 380.9735(5.27), 329.0625(88.35), 317.0722(42.47), 313.0697(100.0), 301.0662(10.34), 299.0485(5.27), 289.0715(30.98), 273.0776(7.81), 192.0157(10.34)                                                                                                                           |
| <b>M17</b><br><b>9</b> | 67.633  | C <sub>33</sub> H <sub>28</sub> O <sub>13</sub> | 631.1488         | Dimer of methyl taxifolin and dehydroxylated dimethyl taxifolin 3 | [M + H] <sup>+</sup> : 633.1291                     | MS <sup>2</sup> [631.1421]: 329.0684(44.66), 317.0718(29.31), 313.0703(100.0), 301.0683(16.73), 298.0421(4.18), 289.0701(31.4), 285.0802(5.57), 280.0438(4.18), 273.0896(4.89), 253.0418(4.18)                                                                                                             |
| <b>M18</b><br><b>0</b> | 59.133  | C <sub>32</sub> H <sub>26</sub> O <sub>14</sub> | 633.1257         | Dimer of methyl taxifolin and methyl taxifolin 1                  | [M + H] <sup>+</sup> : 635.1213                     | MS <sup>2</sup> [633.1254]: 330.0724(4.49), 329.0641(72.09), 317.0639(33.46), 303.0496(2.45), 301.0646(6.07), 297.0364(100.0), 289.0718(13.36), 285.0496(46.07), 269.0391(9.7), 253.0478(4.05), 243.0281(2.84), 241.0556(7.3), 227.0352(18.6); MS <sup>3</sup> [297.0364]: 227.0299(100.0), 225.065(66.23) |
| <b>M18</b><br><b>1</b> | 63.783  | C <sub>32</sub> H <sub>26</sub> O <sub>14</sub> | 633.1252         | Dimer of methyl taxifolin and methyl taxifolin 2                  | [M + H] <sup>+</sup> : 635.1386                     | MS <sup>2</sup> [633.1251]: 329.0625(12.42), 317.0713(10.84), 315.0453(9.56), 303.0487(4.23), 297.0377(100.0), 289.0673(8.81), 269.046(12.72), 253.0492(9.24), 241.0523(13.0), 227.0362(38.16), 225.0619(10.66); MS <sup>3</sup> [297.0376]: 253.0468(11.92), 227.037(100.0), 225.0627(11.92)              |
| <b>M18</b><br><b>2</b> | 69.755  | C <sub>33</sub> H <sub>26</sub> O <sub>14</sub> | 645.1243         | Dimer of methyl taxifolin and dimethyl quercetin 1                | [M + H] <sup>+</sup> : 647.1483                     | MS <sup>2</sup> [645.1245]: 330.0647(19.51), 329.0635(99.94), 327.0475(100.0), 317.0643(58.75), 311.0208(14.56), 301.0699(20.67), 300.0288(12.19), 289.0697(53.9), 285.0749(12.64), 283.0229(21.43), 270.052(14.41); MS <sup>3</sup> [327.0473]: 311.0157(100.0), 299.0567(17.32), 283.0212(34.63)         |
| <b>M18</b><br><b>3</b> | 71.097  | C <sub>33</sub> H <sub>26</sub> O <sub>14</sub> | 645.1252         | Dimer of methyl taxifolin and dimethyl quercetin 2                | [M + H] <sup>+</sup> : 647.1389                     | MS <sup>2</sup> [645.1285]: 329.0651(100.0), 327.0452(88.75), 317.0642(73.12), 315.0486(62.58), 301.0706(39.65), 300.0237(13.28), 289.0685(37.93), 285.0742(26.43), 257.0477(18.26); MS <sup>3</sup> [327.045]: 256.0334(100.0)                                                                            |
| <b>M18</b><br><b>4</b> | 62.067  | C <sub>33</sub> H <sub>28</sub> O <sub>14</sub> | 647.1432         | Dimer of methyl taxifolin and dimethyl taxifolin 1                | [M + 2H <sub>2</sub> O - H] <sup>-</sup> : 683.0739 | MS <sup>2</sup> [647.1432]: 330.067(11.56), 329.0637(100.0), 317.0623(41.85), 301.0705(16.57), 289.0661(27.13), 285.0668(11.9), 273.0851(4.5), 270.0483(4.52), 231.0645(4.03)                                                                                                                              |
| <b>M18</b><br><b>5</b> | 62.600  | C <sub>33</sub> H <sub>28</sub> O <sub>14</sub> | 647.1420         | Dimer of methyl taxifolin and dimethyl taxifolin 2                | [M+H] <sup>+</sup> : 649.1402                       | MS <sup>2</sup> [647.1421]: 331.0632(1.39), 330.0683(12.06), 329.0651(100.0), 317.0634(54.54), 301.0681(31.1), 289.071(37.81), 285.0758(18.72), 270.0536(9.99); MS <sup>3</sup> [329.065]: 270.0485(100.0), 164.0181(85.56)                                                                                |

|                  | tr(min) | Formula                                           | Meas. m/z | Identification                                                         | Other Ions                      | HRMS <sup>a</sup> (Characteristic Fragment Ions and Their Relative Abundance)                                                                                                                                                                                                                                                 |
|------------------|---------|---------------------------------------------------|-----------|------------------------------------------------------------------------|---------------------------------|-------------------------------------------------------------------------------------------------------------------------------------------------------------------------------------------------------------------------------------------------------------------------------------------------------------------------------|
| <b>M18<br/>6</b> | 62.917  | C <sub>33</sub> H <sub>28</sub> O <sub>14</sub>   | 647.1419  | Dimer of methyl taxifolin and dimethyl taxifolin 3                     | [M + H] <sup>+</sup> : 649.1544 | MS <sup>2</sup> [647.1419]: 330.0676(14.44), 329.0678(100.0), 317.0676(33.72), 301.0724(17.31), 289.0709(39.46), 285.0742(14.41), 273.0672(4.34), 271.0678(4.34), 269.0446(4.34), 231.0645(4.34)                                                                                                                              |
| <b>M18<br/>7</b> | 63.183  | C <sub>33</sub> H <sub>28</sub> O <sub>14</sub>   | 647.1406  | Dimer of methyl taxifolin and dimethyl taxifolin 4                     |                                 | MS <sup>2</sup> [647.1368]: 330.0674(37.82), 329.0669(100.0), 317.0632(25.16), 311.0552(14.76), 303.0562(10.65), 301.067(23.06), 289.0673(46.05), 285.0422(8.55), 263.0667(8.55), 253.0461(14.76), 213.047(8.55)                                                                                                              |
| <b>M18<br/>8</b> | 66.483  | C <sub>33</sub> H <sub>28</sub> O <sub>14</sub>   | 647.1434  | Dimer of methyl taxifolin and dimethyl taxifolin 5                     | [M + H] <sup>+</sup> : 649.1516 | MS <sup>2</sup> [647.1434]: 330.0678(32.82), 329.0637(100.0), 317.061(25.6), 301.0701(22.99), 289.0707(32.3), 285.0753(14.74), 273.078(4.33), 270.0498(13.1); MS <sup>3</sup> [329.0637]: 301.0888(24.67), 287.0443(13.46), 270.0519(46.67), 268.0359(44.51), 215.0699(26.74), 165.0081(13.46), 164.0127(100), 137.032(99.63) |
| <b>M18<br/>9</b> | 66.983  | C <sub>33</sub> H <sub>28</sub> O <sub>14</sub>   | 647.1405  | Dimer of methyl taxifolin and dimethyl taxifolin 6                     | [M + H] <sup>+</sup> : 649.1557 | MS <sup>2</sup> [647.1406]: 330.0688(8.27), 329.0637(100.0), 317.0629(32.11), 301.0687(14.07), 289.0707(21.35), 285.0696(3.42), 274.0453(4.38), 269.0601(5.85), 268.0378(11.67)                                                                                                                                               |
| <b>M19<br/>0</b> | 70.430  | C <sub>33</sub> H <sub>28</sub> O <sub>14</sub>   | 647.1421  | Dimer of methyl taxifolin and dimethyl taxifolin 7                     | [M + H] <sup>+</sup> : 649.1720 | MS <sup>2</sup> [647.1424]: 332.0691(5.8), 331.0789(100.0), 319.0782(97.55), 317.0477(3.82), 313.0722(15.5), 301.0761(14.51), 300.0155(3.82), 211.0749(3.82)                                                                                                                                                                  |
| <b>M19<br/>1</b> | 63.958  | C <sub>32</sub> H <sub>26</sub> O <sub>16</sub> S | 697.0891  | Dimer of methyl taxifolin and dehydroxylated methyl taxifolin sulphate | [M + H] <sup>+</sup> : 699.1071 | MS <sup>2</sup> [697.0789]: 617.1241(100.0), 329.0639(24.77), 317.0706(10.6), 313.0455(1.29), 299.0553(22.41), 297.0459(6.25); MS <sup>3</sup> [617.1243]: 329.0645(100.0), 317.0666(76.67), 301.0744(15.27), 299.054(74.09), 289.0637(28.07), 285.0796(15.37)                                                                |

Abbreviations: N means that the fragment ions of a metabolite are not obtained, and its corresponding extracted ion chromatograms in negative ion mode is shown in Figure S4–S11.



Table S2. Bioactivities of taxifolin metabolites.

| No.        | Identification                  | B1     | B2        | B3        | B4        | B5     | B6        | B7        | B8     | B9        | B10    | B11    | B12       |
|------------|---------------------------------|--------|-----------|-----------|-----------|--------|-----------|-----------|--------|-----------|--------|--------|-----------|
| M0         | Taxifolin(parent compound)      | ▲ [1]  | ▲ [2,3]   | ▲ [4]     | ▲ [5,6]   | ▲ [7]  | ▲ [8]     | ▲ [2]     | ▲ [9]  | ▲ [10]    | ▲ [11] | ▲ [12] | ▲ [13,14] |
| M1, M2     | Taxifolin isomer                | ▲ [15] | ▲ [16]    | ▲ [16,17] |           |        | ▲ [18]    |           |        | ▲ [19]    |        |        |           |
| M70        | Quercetin                       | ▲ [1]  | ▲ [20]    | ▲ [21]    | ▲ [5]     | ▲ [22] | ▲ [8,18]  | ▲ [23,24] | ▲ [24] | ▲ [25]    | ▲ [26] | ▲ [27] | ▲ [14,28] |
| M73        | Quercetin-4'-O-sulfate          | ▲ [29] |           |           |           |        |           |           |        |           |        |        |           |
| M74        | Quercetin-3'-O-sulfate          | ▲ [29] |           | ▲ [30,31] |           |        |           |           | ▲ [32] |           |        |        |           |
| M75        | Quercetin-3-O-sulfate           | ▲ [33] | ▲ [34]    |           |           |        |           |           |        |           | ▲ [34] |        |           |
| M76        | Quercetin -glucuronide          | ▲ [29] | ▲ [35]    | ▲ [30,31] | ▲ [5]     |        |           |           | ▲ [32] |           |        | ▲ [27] | ▲ [36]    |
| M80        | Isorhamnetin                    | ▲ [37] | ▲ [20]    | ▲ [21]    | ▲ [5]     |        | ▲ [8]     | ▲ [38]    | ▲ [39] | ▲ [25,40] |        | ▲ [41] | ▲ [14,28] |
| M83        | Isorhamnetin-3-O-sulfate        | ▲ [29] |           |           |           |        |           |           |        |           |        |        |           |
| M85        | Isorhamnetin disulfate          | ▲ [33] |           |           |           | ▲ [42] |           |           |        |           |        |        |           |
| M104       | Eriodictyol                     | ▲ [1]  | ▲ [43]    | ▲ [44]    | ▲ [44,45] | ▲ [46] | ▲ [47]    | ▲ [23]    | ▲ [48] | ▲ [49]    |        | ▲ [50] | ▲ [51]    |
| M105       | Dihydrokaempferol               | ▲ [52] | ▲ [53]    | ▲ [53]    |           |        | ▲ [54,55] |           |        |           |        | ▲ [56] |           |
| M113       | Luteolin-7-O-glucuronide        |        | ▲ [57]    |           |           | ▲ [58] |           |           |        |           |        |        |           |
| M122       | 3/4-hydroxyphenylpropionic acid |        |           |           |           | ▲ [59] | ▲ [60,61] |           |        |           |        |        |           |
| M123       | 3/4-hydroxyphenylpropionic acid |        |           |           |           | ▲ [59] | ▲ [60,61] |           |        |           |        |        |           |
| M131       | Dihydroxyphenylacetic acid      | ▲ [29] | ▲ [62]    | ▲ [63]    |           | ▲ [59] | ▲ [64]    |           |        |           |        | ▲ [65] |           |
| M136       | Dihydrocaffeic acid             | ▲ [29] | ▲ [62,66] |           |           | ▲ [59] | ▲ [60]    | ▲ [67]    |        |           |        |        |           |
| <b>Sum</b> |                                 | 12     | 11        | 10        | 6         | 8      | 10        | 6         | 7      | 5         | 5      | 8      | 6         |

Abbreviations: B1, Antioxidant; B2, Anti-inflammatory; B3, Antitumor; B4, Cardioprotective; B5, Antidiabetic; B6, Antimicrobial; B7, Antiviral; B8, Hepatoprotective; B9, Prevention of Alzheimer disease; B10, Immunoregulatory; B11, Xanthine oxidase inhibitor; B12, Neuroprotective

**Table S3.** The reported targets of taxifolin and its bioactive metabolites.

| Target Name                              | Parent and Metabolites                    |
|------------------------------------------|-------------------------------------------|
| Nrf2                                     | TAX [68], M80 [39], M70 [69], M104 [70]   |
| $\beta$ -amyloid (A $\beta$ ) peptides   | TAX [71], M70 [71], M76 [72]              |
| PI3-K phosphoinositide 3-kinase (PI3K)   | TAX [73], M80 [74], M70 [75]              |
| MEK1                                     | M70 [76], M80 [74]                        |
| EGF receptor (EGFR)                      | TAX [73], M70 [77]                        |
| heme oxygenase-1 (HO-1),<br>microRNA-155 | M70 [78], M104 [70]<br>M70 [79], M80 [79] |
| TBK1-kinase                              | M70 [80], M104 [80]                       |

**Table S4.** Targets of quercetin (M70) as predicted by PharmMapper.

| Rank | PDB ID | Fit Score | Target Name                     |
|------|--------|-----------|---------------------------------|
| 2    | 1uzf   | 3.844     | Angiotensin-converting enzyme   |
| 64   | 1j1b   | 2.984     | Glycogen synthase kinase-3 beta |
| 139  | 1fcm   | 2.915     | Beta-lactamase                  |
| 269  | 1c9c   | 2.897     | Beta-secretase 1                |
| 172  | 1m4h   | 2.85      | Aspartate aminotransferase      |

Event#: 4 MS(E-) Ret. Time: 41.082 Scan#: 3972

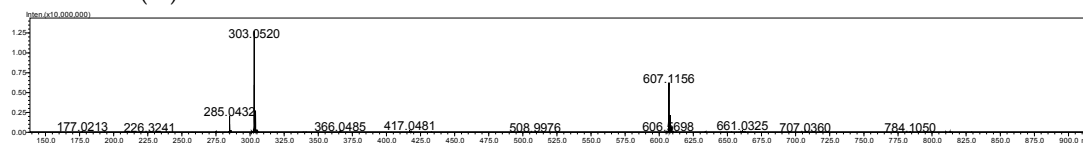

Event#: 5 MS/MS(E-) Ret. Time: 41.082 Scan#: 3973 Precursor: 303.0519 Cutoff: 83

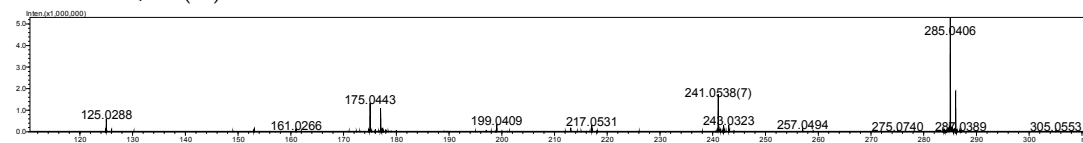Event#: 6 MS<sup>3</sup>(E-) Ret. Time: 41.082 Scan#: 3974 Precursor: 285.0407 Cutoff: 78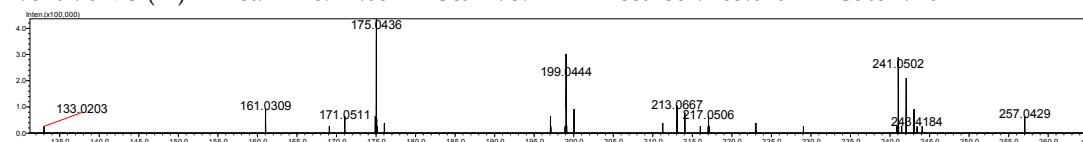**Figure S1.** Negative MS<sup>n</sup> spectra of taxifolin.

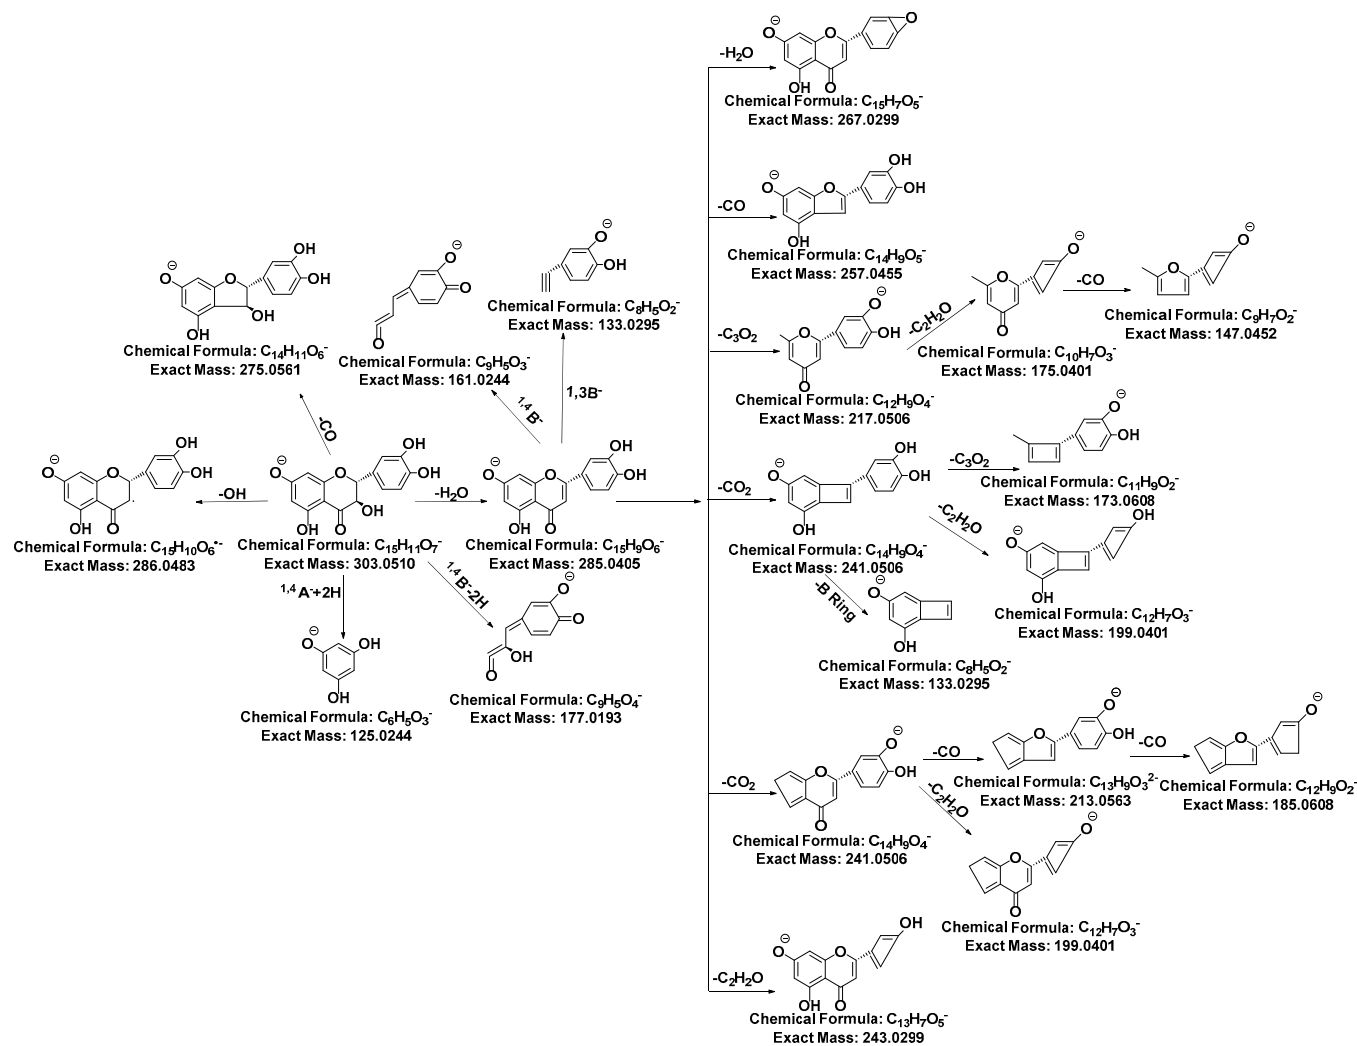

Figure S2. Proposed fragmentation pathways of taxifolin in negative ion detection mode mass spectra.

(A)  
Event#: 5 MS/MS(E-) Ret. Time: 61.342 Scan#: 6221 Precursor: 603.1152 Cutoff: 166

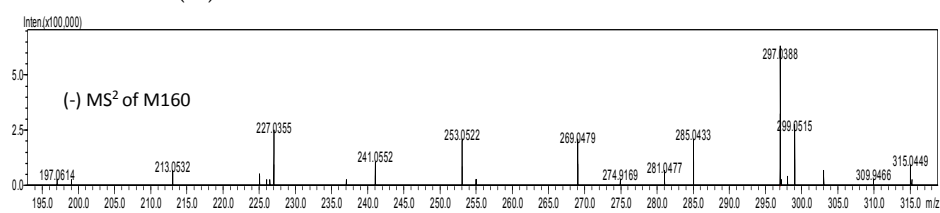

Event#: 6 MS3(E-) Ret. Time: 61.342 Scan#: 6222 Precursor: 297.0388 Cutoff: 82

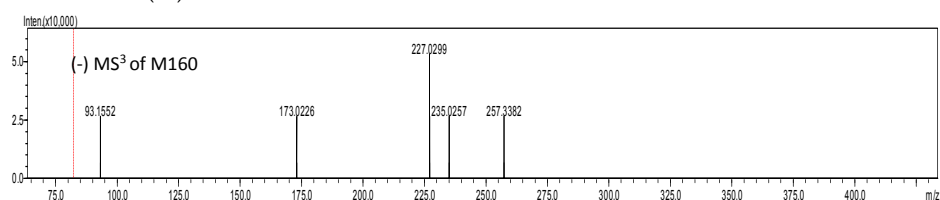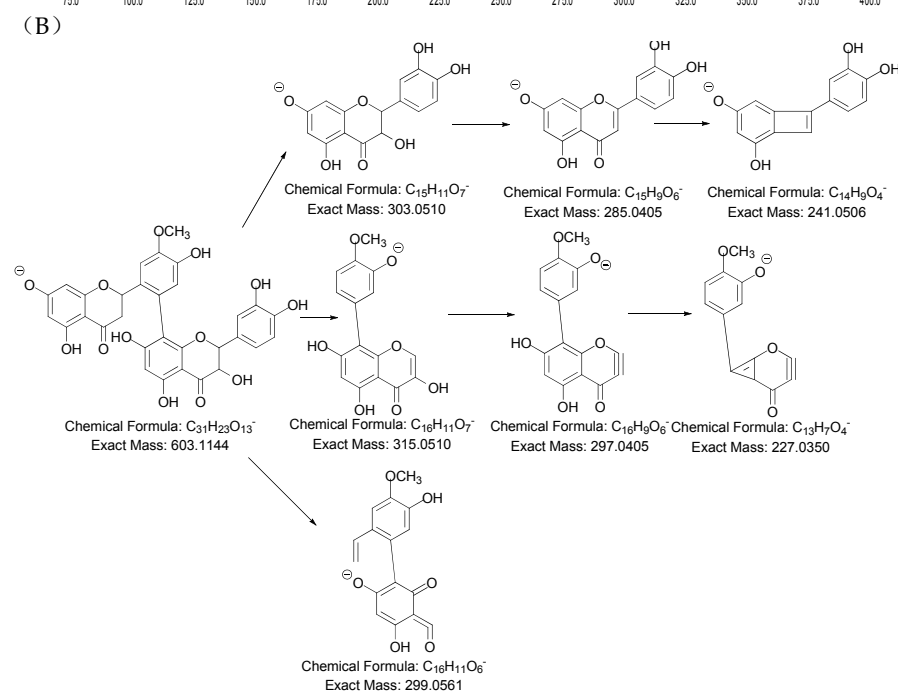

**Figure S3.** Proposed fragmentation pathways of M160 in negative ion detection mode; (A) MS<sup>n</sup> spectra of M160 (B) fragmentation pathways, characteristic fragment ions, and proposed structure.

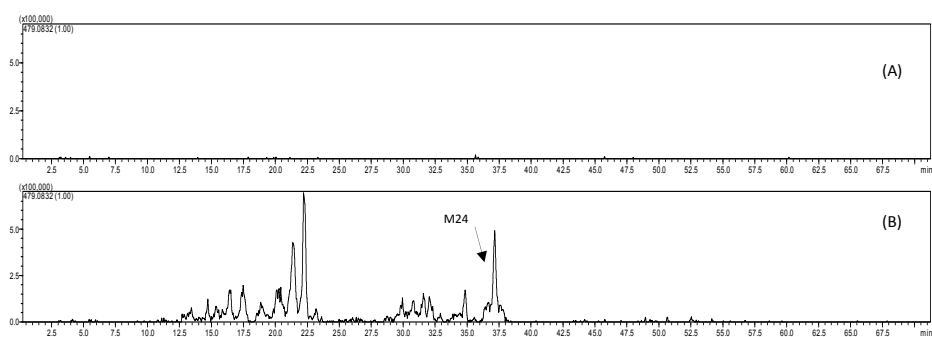

**Figure S4.** Extracted ion chromatograms at *m/z* 479.0832 in negative ion mode of urine samples: (A) blank group; (B) drug group.

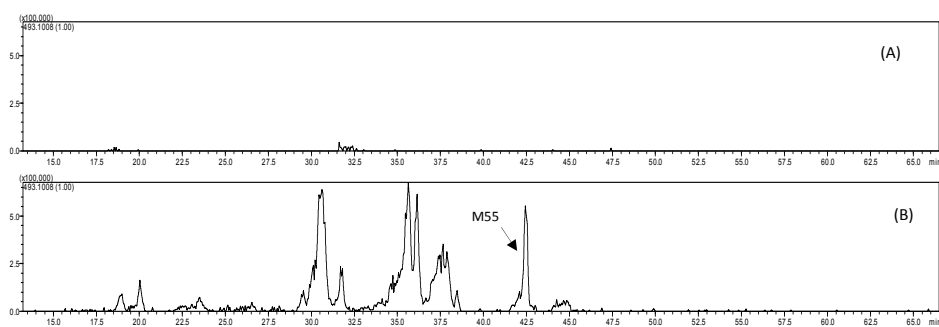

**Figure S5.** Extracted ion chromatograms at  $m/z$  493.1008 in negative ion mode of urine samples: (A) blank group; (B) drug group.

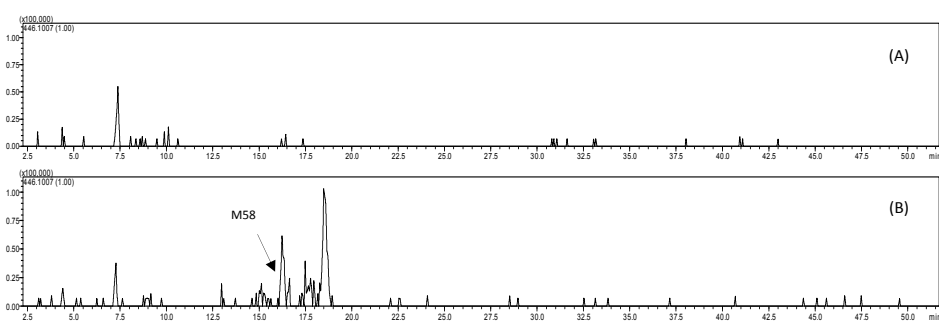

**Figure S6.** Extracted ion chromatograms at  $m/z$  446.1007 in negative ion mode of urine samples: (A) blank group; (B) drug group.

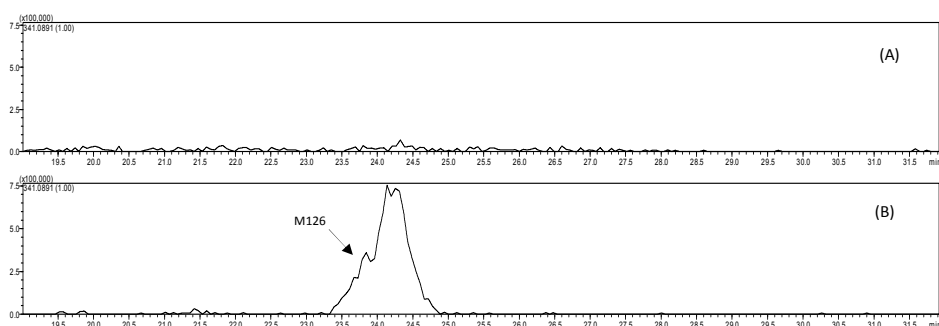

**Figure S7.** Extracted ion chromatograms at  $m/z$  341.0891 in negative ion mode of urine samples: (A) blank group; (B) drug group.

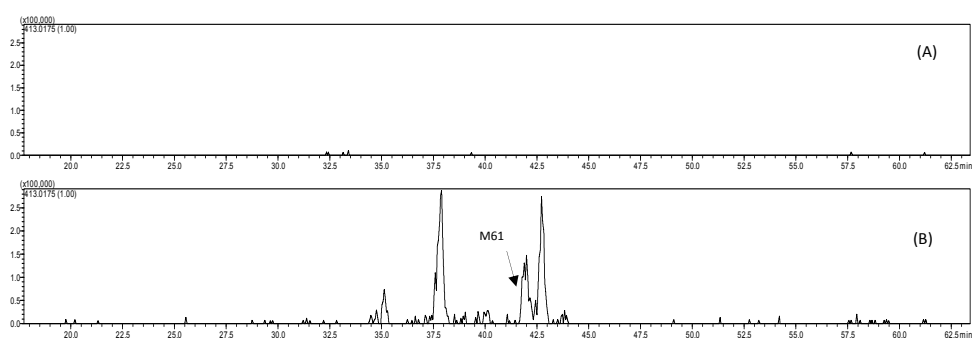

**Figure S8.** Extracted ion chromatograms at  $m/z$  413.0175 in negative ion mode of plasma samples: (A) blank group; (B) drug group.

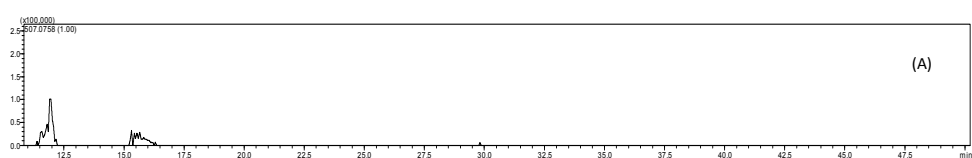

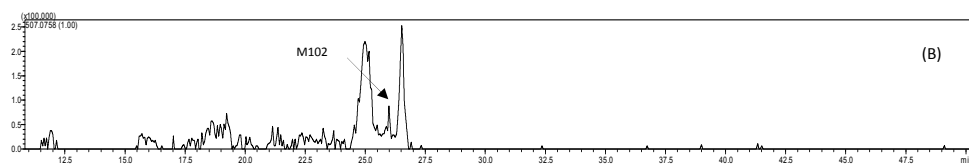

**Figure S9.** Extracted ion chromatograms at  $m/z$  507.0758 in negative ion mode of plasma samples: (A) blank group; (B) drug group.

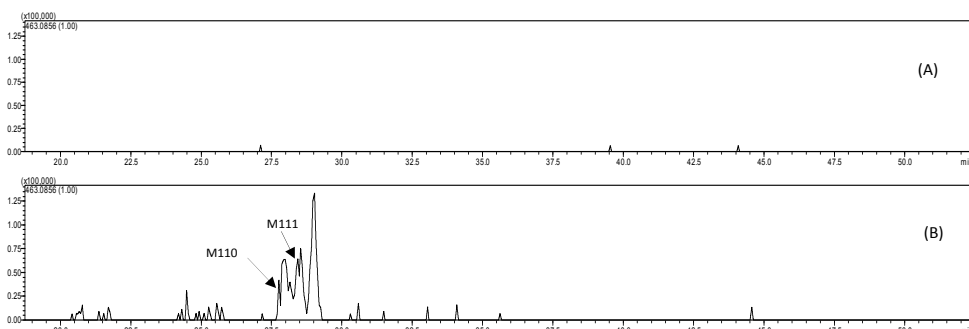

**Figure S10.** Extracted ion chromatograms at  $m/z$  463.0856 in negative ion mode of plasma samples: (A) blank group; (B) drug group

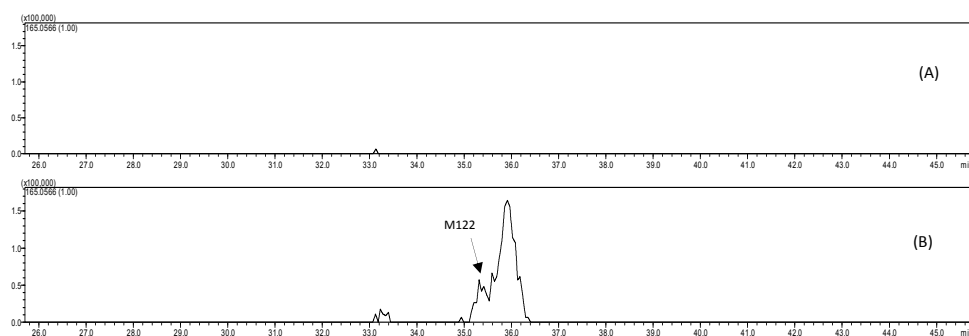

**Figure S11.** Extracted ion chromatograms at  $m/z$  165.0566 in negative ion mode of faecal samples: (A) blank group; (B) drug group.

## References

1. Sawai, Y. NMR analytical approach to clarify the molecular mechanisms of the antioxidative and radical-scavenging activities of antioxidants in tea: Reaction of polyphenols with stable free radicals. *Yasai Chagyo Kenkyusho Kenkyu Hokoku* **2007**, *6*, 23–58.
2. Yadava, R.N.; Raj, M. A new antiviral flavone glycoside from vernonia cinerea less. *Asian J. Chem.* **2013**, *25*, 3542–3544.
3. Delporte, C.; Backhouse, N.; Erazo, S.; Negrete, R.; Vidal, P.; Silva, X.; López-Pérez, J.L.; Feliciano, A.S.; Muñoz, O. Analgesic-antiinflammatory properties of proustia pyrifolia. *J. Ethnopharmacol.* **2005**, *99*, 119–124.
4. Horn, A.H.C. Letter to the editor: Quercetin and taxifolin completely break MDM2-p53 association: Molecular dynamics simulation study by s. Verma, a. Singh, a. Mishra. *Med. Chem. Res.* **2014**, *24*, 291–294.
5. Loke, W.M.; Proudfoot, J.M.; McKinley, A.J.; Needs, P.W.; Kroon, P.A.; Hodgson, J.M.; Croft, K.D. Quercetin and its in vivo metabolites inhibit neutrophil-mediated low-density lipoprotein oxidation. *J. Agric. Food. Chem.* **2008**, *56*, 3609–3615.
6. Guo, H.; Zhang, X.; Cui, Y.; Zhou, H.; Xu, D.; Shan, T.; Zhang, F.; Guo, Y.; Chen, Y.; Wu, D. Taxifolin protects against cardiac hypertrophy and fibrosis during biomechanical stress of pressure overload. *Toxicol. Appl. Pharmacol.* **2015**, *287*, 168–177.
7. Fedosova, N.F.; Alisievich, S.V.; Lyadov, K.V.; Romanova, E.P.; Rud'Ko, I.A.; Kubatiev, A.A. Mechanisms underlying diquertin-mediated regulation of neutrophil function in patients with non-insulin-dependent diabetes mellitus. *Bull. Exp. Biol. Med.* **2004**, *137*, 143–146.

8. Bunghez, F.; Socaciu, C.; Zagrean, F.; Pop, R.M.; Ranga, F.; Romanciuc, F. Characterisation of an aromatic plant-based formula using UV-Vis spectroscopy, LC-ESI(+)-QTOF-MS and HPLC-DAD analysis. *Food Sci. Technol.* **2013**, *70*, 16–24.
9. Teselkin, Y.O.; Babenkova, I.V.; Kolhir, V.K.; Baginskaya, A.I.; Tjukavkina, N.A.; Kolesnik, Y.A.; Selivanova, I.A.; Eichholz, A.A. Dihydroquercetin as a means of antioxidative defence in rats with tetrachloromethane hepatitis. *Phytother. Res.* **2000**, *14*, 160–162.
10. Gocer, H.; Topal, F.; Topal, M.; Kucuk, M.; Teke, D.; Gulcin, I.; Alwasel, S.H.; Supuran, C.T. Acetylcholinesterase and carbonic anhydrase isoenzymes i and ii inhibition profiles of taxifolin. *J. Enzyme Inhib. Med. Chem.* **2015**, 1–7.
11. Ahn, J.Y.; Choi, S.E.; Jeung, M.S.; Park, K.H.; Moon, N.J.; Joo, S.S.; Lee, C.S.; Choi, Y.W.; Li, K.; Lee, M.-K.; et al. Effect of taxifolin glycoside on atopic dermatitis-like skin lesions in NC/Nga mice. *Phytother. Res.* **2010**, *24*, 1071–1077.
12. Van Norren, K.; Van Hoorn, E.C.; Leuvenink, H.G.D.; Hofman, Z. Compositions suitable for the treatment of damage caused by ischemia/reperfusion or oxidative stress. European Patent EP20010915929, 28 June 2006.
13. Wang, Q.Y.; Gao, X.; Wang, X.L.; Zhang, L.Y. Neuroprotective effects and mechanism of taxifolin against neural damage induced by  $\alpha\beta$ . *Zhongguo Shiyan Fangjixue Zazhi* **2014**, *20*, 164–167.
14. Dok-Go, H.; Lee, K.H.; Kim, H.J.; Lee, E.H.; Lee, J.; Song, Y.S.; Lee, Y.-H.; Jin, C.; Lee, Y.S.; Cho, J. Neuroprotective effects of antioxidative flavonoids, quercetin, (+)-dihydroquercetin and quercetin 3-methyl ether, isolated from *Opuntia ficus-indica* var. *Saboten*. *Brain Res.* **2003**, *965*, 130–136.
15. Jiang, W.-J.; Ishiuchi, K.-i.; Furukawa, M.; Takamiya, T.; Kitanaka, S.; Iijima, H. Stereospecific b inhibition of nitric oxide production in macrophage cells by flavanones: Synthesis and the structure-activity relationship. *Bioorg. Med. Chem.* **2015**, *23*, 6922–6929.
16. Kim, K.H.; Moon, E.; Choi, S.U.; Pang, C.; Kim, S.Y.; Lee, K.R. Identification of cytotoxic and anti-inflammatory constituents from the bark of *Toxicodendron vernicifluum* (Stokes) f.A. Barkley. *J. Ethnopharmacol.* **2015**, *162*, 231–237.
17. Wang, Y.-F.; Cao, J.-X.; Efferth, T.; Lai, G.-F.; Luo, S.-D. Cytotoxic and new tetralone derivatives from *Berchemia floribunda* (Wall.) Brongn. *Chem. Biodivers.* **2006**, *3*, 646–653.
18. Nandan, D.; Lopez, M.; Ban, F.; Huang, M.; Li, Y.; Reiner, N.E.; Cherkasov, A. Indel-based targeting of essential proteins in human pathogens that have close host ortholog(s): Discovery of selective inhibitors for *Leishmania donovani* elongation factor-1 $\alpha$ . *Proteins: Struct. Funct. Bioinf.* **2007**, *67*, 53–64.
19. Sato, M.; Murakami, K.; Uno, M.; Ikubo, H.; Nakagawa, Y.; Katayama, S.; Akagi, K.; Irie, K. Structure-activity relationship for (+)-taxifolin isolated from *Silymarin* as an inhibitor of amyloid beta aggregation. *Biosci. Biotechnol. Biochem.* **2013**, *77*, 1100–1103.
20. Boesch-Saadatmandi, C.; Loboda, A.; Wagner, A.E.; Stachurska, A.; Jozkowicz, A.; Dulak, J.; Doring, F.; Wolffram, S.; Rimbach, G. Effect of quercetin and its metabolites isorhamnetin and quercetin-3-glucuronide on inflammatory gene expression: Role of MIR-155. *J. Nutr. Biochem.* **2011**, *22*, 293–299.
21. Delgado, L.; Fernandes, I.; Gonzalez-Manzano, S.; de Freitas, V.; Mateus, N.; Santos-Buelga, C. Anti-proliferative effects of quercetin and catechin metabolites. *Food Funct.* **2014**, *5*, 797–803.
22. Boonpawa, R.; Spenkelink, A.; Rietjens, I.M.C.M.; Punt, A. A physiologically based kinetic (pbk) model describing plasma concentrations of quercetin and its metabolites in rats. *Biochem. Pharmacol.* **2014**, *89*, 287–299.
23. Li, Y.; Wang, H.; Fan, Z.; Su, M.; Xue, J.; Li, T.; Cen, Y. Flavonoids from *Adina pilulifera* and their in vitro antiviral activity. *Tianran Chanwu Yanjiu Yu Kaifa* **2009**, *21*, 740–743.
24. Kumar, S.; Pandey, A.K. Chemistry and biological activities of flavonoids: An overview. *Scientific World J.* **2013**, *2013*, 162750.
25. Li, C.; Hu, L.; Shen, X.; Yang, Z.; Jiang, H. Extraction of  $\beta$ -secretase inhibitor flavonol compound from ginkgo leaf and its application for treatment of Alzheimer's disease. Chinese Patent, Application No.: CN200610028826.4, 11 July 2006.
26. Sternberg, Z.; Chadha, K.; Lieberman, A.; Hojnacki, D.; Drake, A.; Zamboni, P.; Rocco, P.; Grazioli, E.; Weinstock-Guttman, B.; Munschauer, F. Quercetin and interferon- $\beta$  modulate immune response(s) in peripheral blood mononuclear cells isolated from multiple sclerosis patients. *J. Neuroimmun.* **2008**, *205*, 142–147.
27. Day, A.J.; Bao, Y.; Morgan, M.R.A.; Williamson, G. Conjugation position of quercetin glucuronides and

- effect on biological activity. *Free Radic. Biol. Med.* **2000**, *29*, 1234–1243.
28. Karjalainen, R.; Anttonen, M.; Saviranta, N.; Hilz, H.; Torronen, R.; Stewart, D.; McDougall, G.J.; Mattila, P. A review on bioactive compounds in black currants (*Ribes nigrum* L.) and their potential health-promoting properties. *Acta Horticulturae* **2009**, *839*, 301–307.
  29. Duenas, M.; Surco-Laos, F.; Gonzalez-Manzano, S.; Gonzalez-Paramas, A.M.; Santos-Buelga, C. Antioxidant properties of major metabolites of quercetin. *Eur. Food Res. Technol.* **2011**, *232*, 103–111.
  30. Donnini, S.; Finetti, F.; Lusini, L.; Morbidelli, L.; Cheynier, V.; Barron, D.; Williamson, G.; Waltenberger, J.; Ziche, M. Divergent effects of quercetin conjugates on angiogenesis. *Br. J. Nutr.* **2006**, *95*, 1016–1023.
  31. Yang, J.-H.; Hsia, T.-C.; Kuo, H.-M.; Chao, P.-D.L.; Chou, C.-C.; Wei, Y.-H.; Chung, J.-G. Inhibition of lung cancer cell growth by quercetin glucuronides via G2/M arrest and induction of apoptosis. *Drug Metab. Dispos.* **2006**, *34*, 296–304.
  32. Yokoyama, A.; Sakakibara, H.; Crozier, A.; Kawai, Y.; Matsui, A.; Terao, J.; Kumazawa, S.; Shimoi, K. Quercetin metabolites and protection against peroxynitrite-induced oxidative hepatic injury in rats. *Free Radical Res.* **2009**, *43*, 913–921.
  33. Yagi, A.; Uemura, T.; Okamura, N.; Haraguchi, H.; Imoto, T.; Hashimoto, K. Antioxidative sulfated flavonoids in leaves of polygonum hydropiper. *Phytochemistry* **1994**, *35*, 885–887.
  34. Ksouri, R.; Ksouri, W.M.; Jallali, I.; Debez, A.; Magne, C.; Hiroko, I.; Abdelly, C. Medicinal halophytes: Potent source of health promoting biomolecules with medical, nutraceutical and food applications. *Crit. Rev. Biotechnol.* **2012**, *32*, 289–326.
  35. Derlindati, E.; Dall'Asta, M.; Ardigo, D.; Brighenti, F.; Zavaroni, I.; Crozier, A.; Del Rio, D. Quercetin-3-O-glucuronide affects the gene expression profile of M1 and M2a human macrophages exhibiting anti-inflammatory effects. *Food Funct.* **2012**, *3*, 1144–1152.
  36. Faria, A.; Meireles, M.; Fernandes, I.; Santos-Buelga, C.; Gonzalez-Manzano, S.; Duenas, M.; de Freitas, V.; Mateus, N.; Calhau, C. Flavonoid metabolites transport across a human BBB model. *Food Chem.* **2014**, *149*, 190–196.
  37. Seo, K.; Yang, J.H.; Kim, S.C.; Ku, S.K.; Ki, S.H.; Shin, S.M. The antioxidant effects of isorhamnetin contribute to inhibit COX-2 expression in response to inflammation: A potential role of HO-1. *Inflammation* **2014**, *37*, 712–722.
  38. Du, L.-n.; Shan, J.-j.; Xu, J.-y.; Dai, Q.-g.; Wang, S.-c. In vitro experimental study of anti-respiratory syncytial virus effect of jinxin oral liquid transitional ingredients in blood. *Zhonghua Zhongyiyao Zazhi* **2013**, *28*, 955–958.
  39. Yang, J.H.; Shin, B.Y.; Han, J.Y.; Kim, M.G.; Wi, J.E.; Kim, Y.W.; Cho, I.J.; Kim, S.C.; Shin, S.M.; Ki, S.H. Isorhamnetin protects against oxidative stress by activating nrf2 and inducing the expression of its target genes. *Toxicol. Appl. Pharmacol.* **2014**, *274*, 293–301.
  40. Xu, S.L.; Zhu, K.Y.; Bi, C.W.C.; Choi, R.C.Y.; Miernisha, A.; Yan, A.L.; Maiwulanjiang, M.; Men, S.W.X.; Dong, T.T.X.; Tsim, K.W.K. Flavonoids induce the expression of synaptic proteins, synaptotagmin, and postsynaptic density protein-95 in cultured rat cortical neuron. *Planta Med.* **2013**, *79*, 1710–1714.
  41. Liu, Z.; Liu, S.; Xing, J.; Song, F.; Zheng, C.; Liu, S. Method for screening xanthine oxidase inhibitor by ultrahigh-performance liquid chromatography-mass spectrometry. Chinese Patent, Application No.: CN201010577534.2, 8 December 2010.
  42. Haraguchi, H.; Ohmi, I.; Sakai, S.; Fukuda, A.; Toihara, Y.; Fujimoto, T.; Okamura, N.; Yagi, A. Effect of polygonum hydropiper sulfated flavonoids on lens aldose reductase and related enzymes. *J. Nat. Prod.* **1996**, *59*, 443–445.
  43. Armah, F.A.; Annan, K.; Mensah, A.Y.; Amponsah, I.K.; Tocher, D.A.; Habtemariam, S. Erythroivorenin: A novel anti-inflammatory diterpene from the root-bark of erythrophleum ivorense (a chev.). *Fitoterapia* **2015**, *105*, 37–42.
  44. Lee, S.E.; Yang, H.; Son, G.W.; Park, H.R.; Park, C.-S.; Park, Y.S.; Jin, Y.-H. Eriodictyol protects endothelial cells against oxidative stress-induced cell death through modulating ERK/Nrf2/are-dependent heme oxygenase-1 expression. *Int. J. Mol. Sci.* **2015**, *16*, 14526–14539.
  45. Wang, C.; Zhang, Y.F.; Zhao, X.P. Study on screening cardioprotective components from zhishi xiebai guizhi tang. *Zhongguo Zhong Yao Za Zhi* **2013**, *38*, 1601–1605.
  46. Zhang, W.Y.; Lee, J.J.; Kim, Y.; Kim, I.S.; Han, J.H.; Lee, S.G.; Ahn, M.J.; Jung, S.H.; Myung, C.S. Effect of eriodictyol on glucose uptake and insulin resistance in vitro. *J. Agric. Food Chem.* **2012**, *60*, 7652–7658.
  47. Habtemariam, S.; Dagne, E. Comparative antioxidant, prooxidant and cytotoxic activity of sigmoidin A and



- eriodictyol. *Planta Med.* **2010**, *76*, 589–594.
48. Ferreira, P.S.; Nasser, A.L.M.; Goncalves, D.; Spolidorio, L.C.; Manthey, J.A.; Cesar, T.B. In Citrus Flavonones Decreases Oxidative Stress in the Liver and Blood Serum Caused by High-Fat Diet Feeding in c57bl/6j Mice, ACS National Meeting & Exposition, Boston, MA, USA, 16–20 August 2015.
  49. Jing, X.; Shi, H.; Zhu, X.; Wei, X.; Ren, M.; Han, M.; Ren, D.; Lou, H. Eriodictyol attenuates  $\beta$ -amyloid 25-35 peptide-induced oxidative cell death in primary cultured neurons by activation of Nrf2. *Neurochem. Res.* **2015**, *40*, 1463–1471.
  50. Nguyen, M.T.T.; Awale, S.; Tezuka, Y.; le Tran, Q.; Watanabe, H.; Kadota, S. Xanthine oxidase inhibitory activity of vietnamese medicinal plants. *Biol. Pharm.Bull.* **2004**, *27*, 1414–1421.
  51. Cho, N.; Choi, J.H.; Yang, H.; Jeong, E.J.; Lee, K.Y.; Kim, Y.C.; Sung, S.H. Neuroprotective and anti-inflammatory effects of flavonoids isolated from rhus verniciflua in neuronal HT22 and microglial BV2 cell lines. *Food Chem. Toxicol.* **2012**, *50*, 1940–1945.
  52. Lee, I.K.; Song, K.S.; Kim, C.J.; Kim, H.M.; Oh, G.T.; Yoo, I.D. Tumor cell growth inhibition and antioxidant activity of flavonoids from the stem bark of cudrania tricuspidata. *Han'guk Nonghwa Hakhoechi* **1994**, *37*, 105–109.
  53. Tan, Y.; Liu, C.; Chen, R. Phenolic constituents from stem bark of morus wittiorum and their anti-inflammation and cytotoxicity. *Zhongguo Zhong Yao Za Zhi* **2010**, *35*, 2700–2703.
  54. Ango, P.Y.; Kapche, D.W.F.G.; Kuete, V.; Ngadjui, B.T.; Bezabih, M.; Abegaz, B.M. Chemical constituents of trilepisium madagascariense (moraceae) and their antimicrobial activity. *Phytochem. Lett.* **2012**, *5*, 524–528.
  55. Tajuddeen, N.; Sallau, M.S.; Musa, A.M.; Habila, D.J.; Yahaya, S.M. Flavonoids with antimicrobial activity from the stem bark of commiphora pedunculata (kotschy & peyr.) engl. *Natural Prod. Res.* **2014**, *28*, 1915–1918.
  56. Xu, W.A.; Yin, L.; Pan, H.Y.; Shi, L.; Xu, L.; Zhang, X.; Duan, J.A. Study on the correlation between constituents detected in serum from rhizoma smilacis glabrae and the reduction of uric acid levels in hyperuricemia. *J. Ethnopharmacol.* **2013**, *150*, 747–754.
  57. Min, Y.S.; Bai, K.L.; Yim, S.H.; Lee, Y.J.; Song, H.J.; Kim, J.H.; Ham, I.; Whang, W.K.; Sohn, U.D. The effect of luteolin-7-O- $\beta$ -d-glucuronopyranoside on gastritis and esophagitis in rats. *Arch. Pharmacol Res.* **2006**, *29*, 484–489.
  58. Shimizu, M.; Ito, T.; Terashima, S.; Hayashi, T.; Arisawa, M.; Morita, N.; Kurokawa, S.; Ito, K.; Hashimoto, Y. Inhibition of lens aldose reductase by flavonoids. *Phytochemistry* **1984**, *23*, 1885–1888.
  59. Fernandez-Millan, E.; Ramos, S.; Alvarez, C.; Bravo, L.; Goya, L.; Martin, M.A. Microbial phenolic metabolites improve glucose-stimulated insulin secretion and protect pancreatic beta cells against tert-butyl hydroperoxide-induced toxicity via ERKs and PKC pathways. *Food Chem. Toxicol.* **2014**, *66*, 245–253.
  60. Kabbash, C.; Silverstein, S.C.; Shuman, H.A.; Blanchard, J.S. Antimicrobial activity of gemfibrozil and related compounds and derivatives and metabolites based on inhibition of enoyl-[acyl carrier protein] reductase. US Patent US1999-438144, 19 April 2005.
  61. Cueva, C.; Moreno-Arribas, M.V.; Martin-Alvarez, P.J.; Bills, G.; Vicente, M.F.; Basilio, A.; Rivas, C.L.; Requena, T.; Rodriguez, J.M.; Bartolome, B. Antimicrobial activity of phenolic acids against commensal, probiotic and pathogenic bacteria. *Res. Microbiol.* **2010**, *161*, 372–382.
  62. Monagas, M.; Khan, N.; Andres-Lacueva, C.; Urpi-Sarda, M.; Vazquez-Agell, M.; Lamuela-Raventos, R.M.; Estruch, R. Dihydroxylated phenolic acids derived from microbial metabolism reduce lipopolysaccharide-stimulated cytokine secretion by human peripheral blood mononuclear cells. *Br. J. Nutr.* **2009**, *102*, 201–206.
  63. Gao, K.; Xu, A.; Krul, C.; Venema, K.; Liu, Y.; Niu, Y.; Lu, J.; Bensoussan, L.; Seeram, N.P.; Heber, D.; et al. Of the major phenolic acids formed during human microbial fermentation of tea, citrus, and soy flavonoid supplements, only 3,4-dihydroxyphenylacetic acid has antiproliferative activity. *J. Nutrition* **2006**, *136*, 52–57.
  64. Alakomi, H.L.; Puupponen-Pimia, R.; Aura, A.M.; Helander, I.M.; Nohynek, L.; Oksman-Caldentey, K.M.; Saarela, M. Weakening of salmonella with selected microbial metabolites of berry-derived phenolic compounds and organic acids. *J. Agric. Food. Chem.* **2007**, *55*, 3905–3912.
  65. Kubo, I.; Masuoka, N.; Nihei, K.I.; Burgheim, B. Manicoba, a quercetin-rich amazonian dish. *J. Food Compos. Anal.* **2006**, *19*, 579–588.
  66. Yang, X.W.; Wang, N.; Li, W.; Xu, W.; Wu, S. Biotransformation of 4,5-O-dicaffeoylquinic acid methyl ester by human intestinal flora and evaluation on their inhibition of no production and antioxidant activity of the products. *Food Chem. Toxicol.* **2013**, *55*, 297–303.

67. Helbig, B.; Thiel, K.D. Comparison of the antiviral activity of oxidized caffeic acid and hydrocaffeic acid against herpesvirus hominis types 1 and 2 in vitro. *Die Pharmazie* **1982**, *37*, 603–604.
68. Samatiwat, P.; Prawan, A.; Senggunprai, L.; Kukongviriyapan, V. Taxifolin exerts cytoprotective effect by activation of Nrf2-are signaling pathway in HepG2 cells. *Srinagarind Med. J.* **2014**, *29*, 122–125.
69. Granado-Serrano, A.B.; Martín, M.A.; Bravo, L.; Goya, L.; Ramos, S. Quercetin modulates NRF2 and glutathione-related defenses in HepG2 cells: Involvement of p38. *Chem. Biol. Interact.* **2012**, *195*, 154–164.
70. Lee, S.E.; Yang, H.; Son, G.W.; Park, H.R.; Park, C.S.; Jin, Y.H.; Park, Y.S. Eriodictyol protects endothelial cells against oxidative stress-induced cell death through modulating ERK/Nrf2/ARE-dependent heme oxygenase-1 expression. *Int. J. Mol. Sci.* **2015**, *16*, 14526–14539.
71. Hanaki, M.; Murakami, K.; Akagi, K.I.; Irie, K. Structural insights into mechanisms for inhibiting amyloid  $\beta$ 42 aggregation by non-catechol-type flavonoids. *Bioorg. Med. Chem.* **2016**, *24*, 304–313.
72. Ho, L.; Ferruzzi, M.G.; Janle, E.M.; Wang, J.; Gong, B.; Chen, T.Y.; Lobo, J.; Cooper, B.; Wu, Q.L.; Talcott, S.T. Identification of brain-targeted bioactive dietary quercetin-3-O-glucuronide as a novel intervention for Alzheimer's disease. *FASEB. J.* **2013**, *27*, 769–781.
73. Oi, N.; Chen, H.; Kim, M.O.; Lubet, R.A.; Bode, A.M.; Dong, Z. Taxifolin suppresses UV-induced skin carcinogenesis by targeting EGFR and PI3K. *Cancer Prev. Res.* **2012**, *5*, 1103–1114.
74. Kim, J.E.; Lee, D.E.; Lee, K.W.; Son, J.E.; Seo, S.K.; Li, J.; Jung, S.K.; Heo, Y.S.; Mottamal, M.; Bode, A.M. Isorhamnetin suppresses skin cancer through direct inhibition of mek1 and PI3-K. *Cancer Prev. Res.* **2011**, *4*, 582–591.
75. Yoshizumi, M.A.M.T.U.; Tsuchiya, K.; Kirima, K.; Kyaw, M.; Suzaki, Y.; Tamaki, T. Quercetin inhibits Shc and phosphatidylinositol 3-kinase-mediated c-Jun N-terminal kinase activation by angiotensin ii in cultured rat aortic smooth muscle cells. *Mol. Pharmacol.* **2001**, *60*, 656–665.
76. Nguyen, T.T.T.; Tran, E.; Nguyen, T.H.; Do, P.T.; Huynh, T.H.; Huynh, H. The role of activated MEK-ERK pathway in quercetin. *Carcinogenesis* **2004**, *25*, 647–659.
77. Fridrich, D.; Teller, N.; Esselen, M.; Pahlke, G.; Marko, D. Comparison of delphinidin, quercetin and (–)-epigallocatechin-3-gallate as inhibitors of the EGFR and the ErbB2 receptor phosphorylation. *Mol. Nutr. Food Res.* **2008**, *52*, 815–822.
78. Rayamajhi, N.; Kim, S.K.; Go, H.; Joe, Y.; Callaway, Z.; Kang, J.G.; Ryter, S.W.; Chung, H.T. Quercetin induces mitochondrial biogenesis through activation of HO-1 in HepG2 cells. *Oxid. Med. Cell. Longev.* **2013**, *2013*, 450–450.
79. Boesch-Saadatmandi, C.; Loboda, A.; Wagner, A.E.; Stachurska, A.; Jozkowicz, A.; Dulak, J.; Döring, F.; Wolfram, S.; Rimbach, G. Effect of quercetin and its metabolites isorhamnetin and quercetin-3-glucuronide on inflammatory gene expression: Role of miR-155. *J. Nutr. Biochem.* **2011**, *22*, 293–299.
80. Lee, J.K.; Kim, S.Y.; Kim, Y.S.; Lee, W.H.; Hwang, D.H.; Lee, J.Y. Suppression of the TRIF-dependent signaling pathway of toll-like receptors by luteolin. *Biochem. Pharmacol.* **2009**, *77*, 1391–1400.
